# Supplementary material for: Identification of genomic regions for grain yield and yield stability and their epistatic interactions
Source: PubMed Central journal article supplement (PMC5286416; doi:10.1038/srep41578), 2017-02-01
Supplement: srep41578-s1.pdf [file srep41578-s1.pdf]

**Genome wide association study for wide environmental adaptation in a large spring bread wheat population using genotyping-by-sequencing approach**

Deepmala Sehgal<sup>1</sup>, Enrique Autrique<sup>1</sup>, Ravi Singh<sup>1</sup>, Marc Ellis<sup>1</sup>, Sukhwinder Singh<sup>1</sup>, Susanne Dreisigacker<sup>1\*</sup>

<sup>1</sup>International Center for Maize and Wheat Improvement (CIMMYT), Km. 45, Carretera México-Veracruz, El Batán, Texcoco, México, CP 56237

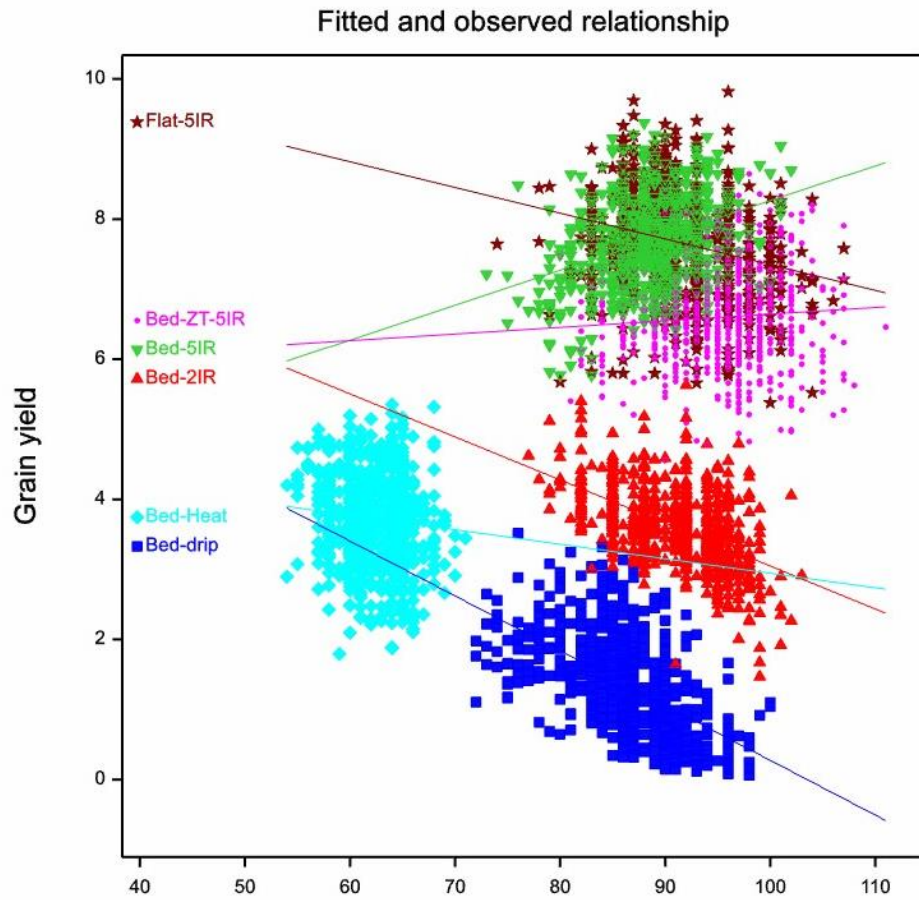

Supplementary Fig. S1 Phenotypic correlations between grain yield and days to heading under different environments

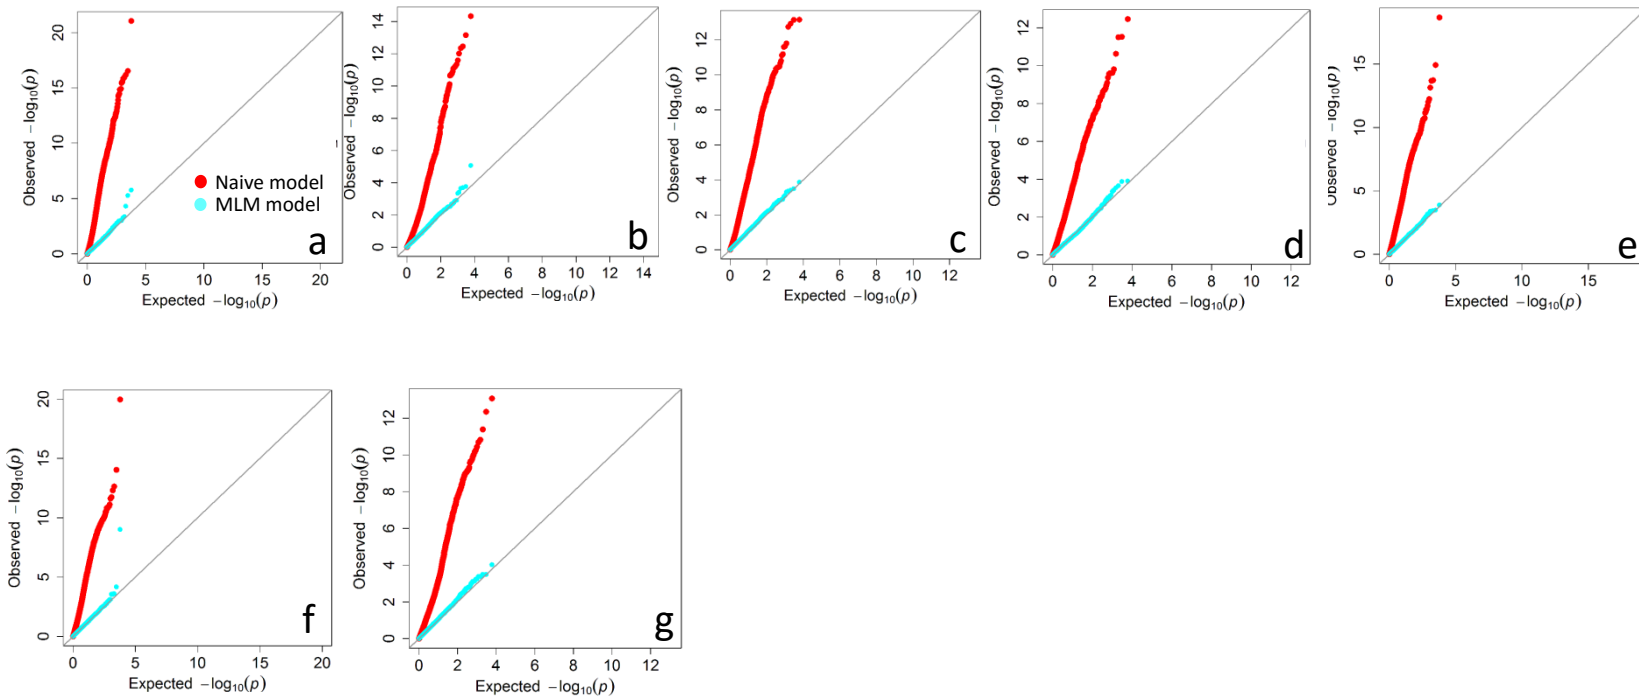

Supplementary Fig. S2 Quantile – Quantile plots for naïve and mixed linear model (using PC, kinship or PC + kinship based on BIC (Bayesian Information Content) for yield stability (a) and grain yield under different environments (b; Bed 5IR, c; Flat 5IR, d; Bed ZT 5IR, e; Bed drip, f; Bed 2IR and g; Bed heat)

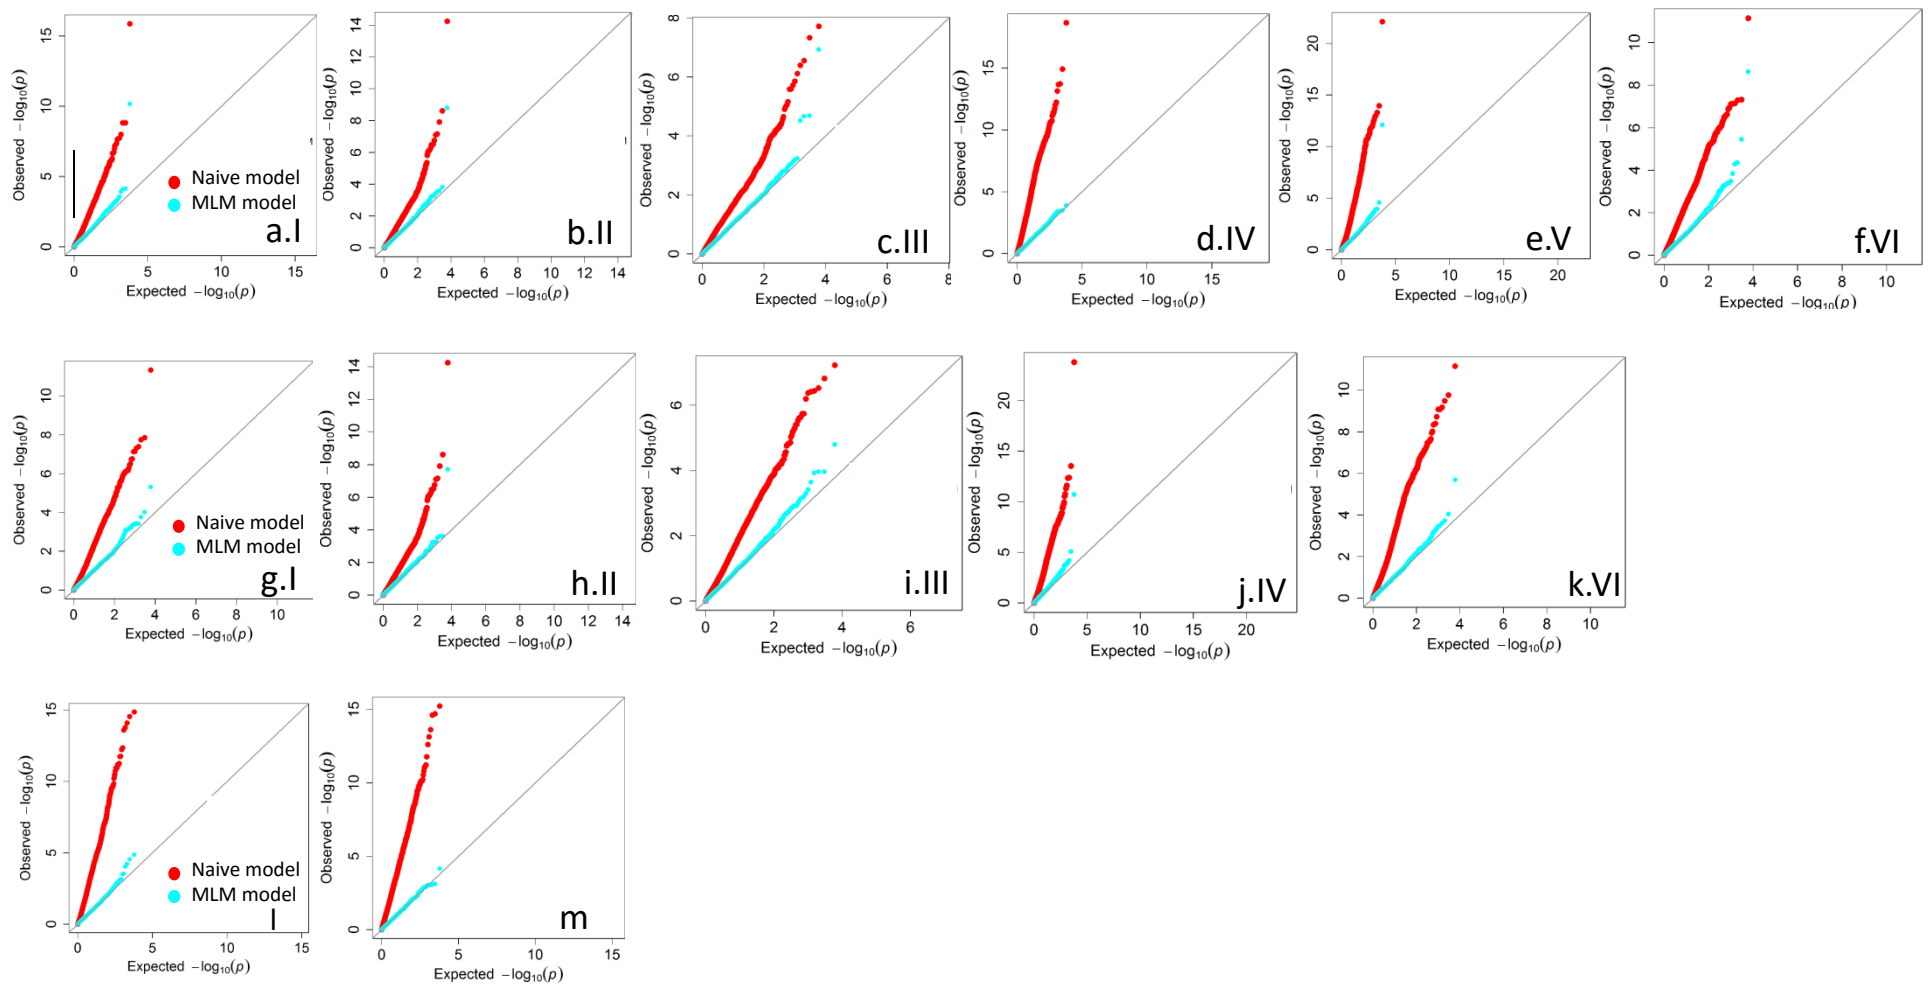

Supplementary Fig. S3 Quantile – Quantile plots for naïve and mixed linear model for days to heading (a-f) and plant height (g-k) in different environments (I; Bed 5IR, II; Bed ZT 5IR, III; Flat 5IR, IV; Bed 2IR, V; Bed drip, and VI; Bed heat) and for DSI (l) and HSI (m)

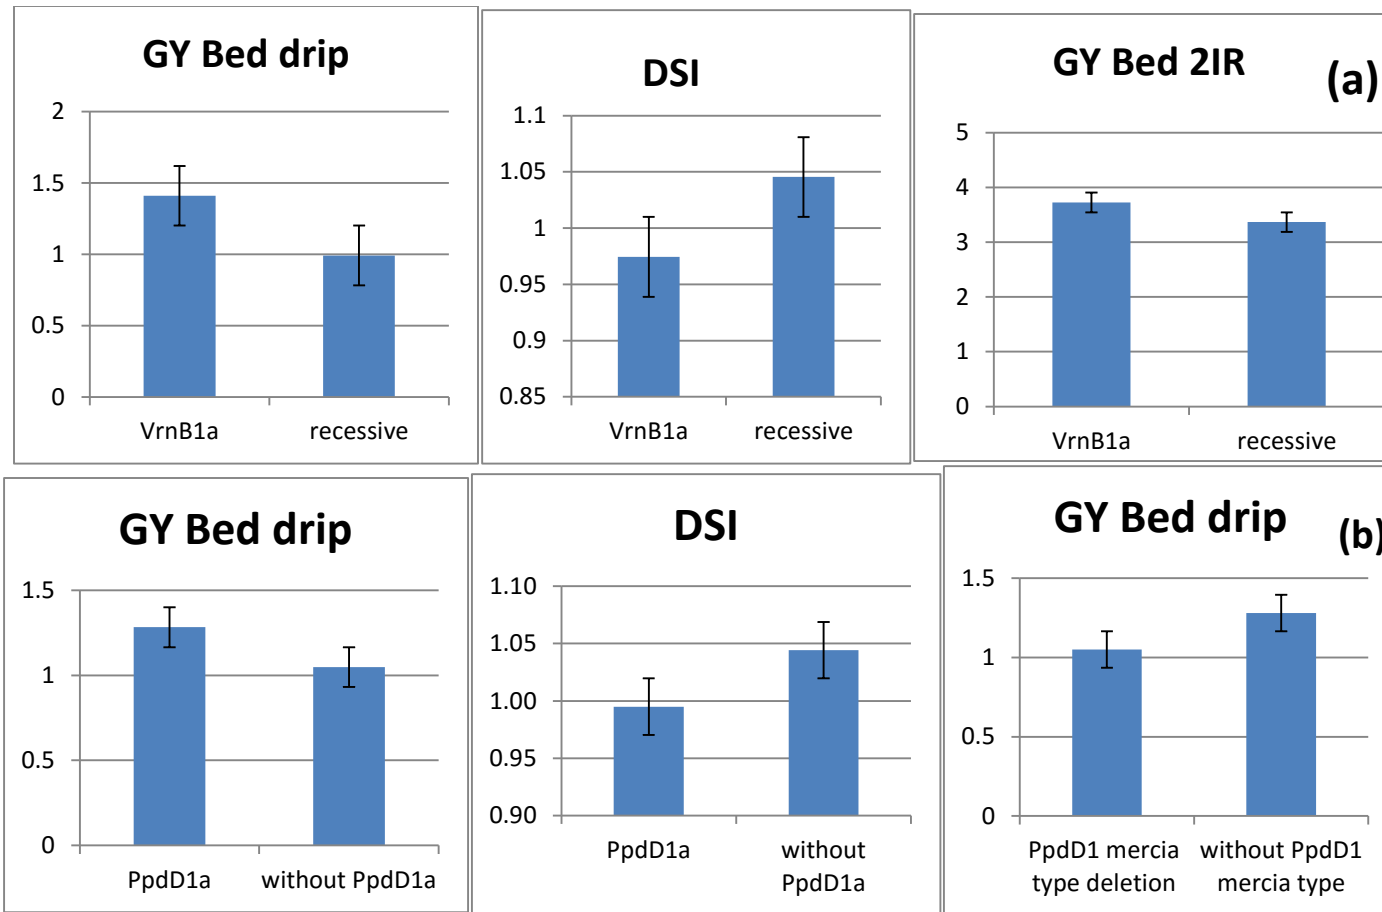

Supplementary Fig. S4 Allelic effects of *Vrn-B1a* on grain yield (GY) under both drought stress environments and drought susceptibility index (DSI) (a) and allelic effects of *Ppd-D1a* (Ciano type deletion conferring photoperiod insensitivity) and *Ppd-D1* Mercia type insertion conferring photoperiod sensitivity on GY under severe drought stress treatment and DSI. Earlier flowering lines carrying dominant spring allele *Vrn-B1a* or photoperiod insensitive allele *Ppd-D1a* are higher yielding under drought stress environments with lower DSI than lines carrying recessive *vrn* allele or photoperiod sensitive allele (Mercia type insertion).

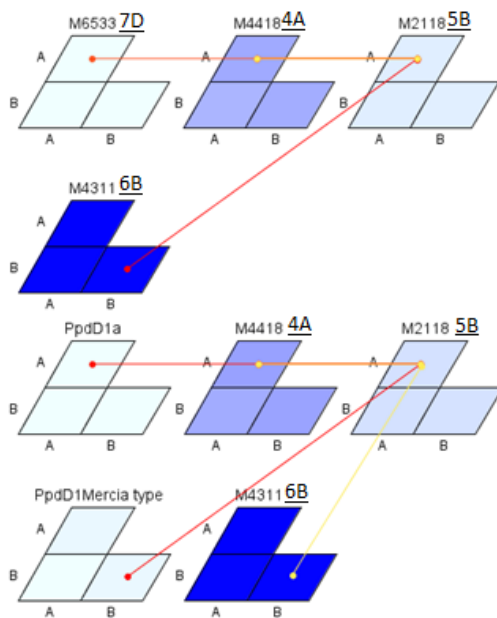

Bed 5IR

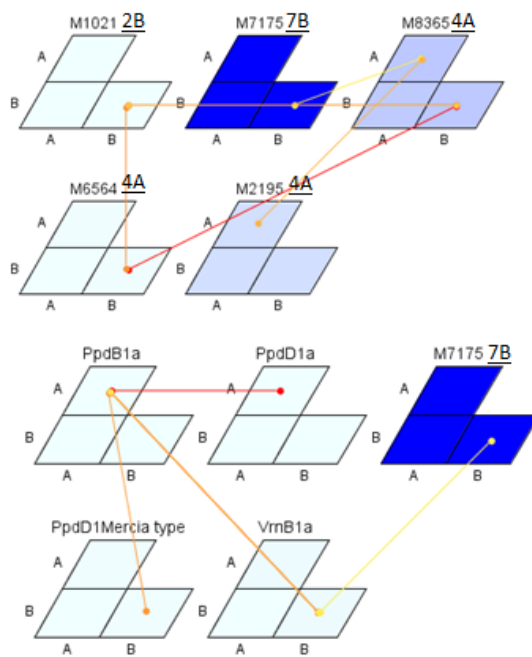

Bed ZT 5IR

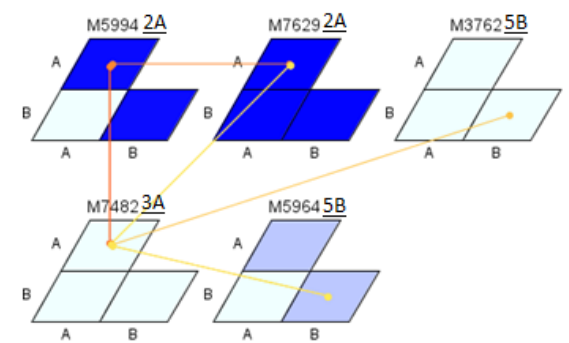

Flat 5IR

Supplementary Fig. S5 For each of the irrigated conditions, epistatic interactions are shown among associated markers without (above) and with major genes (below) included in the model. The A and B are the two alleles for each marker. The magnitude of marker effect (F value) is represented with shades of blue from light to dark (higher effect). The magnitude of epistatic interaction is presented with colors from yellow to red (stronger interaction).

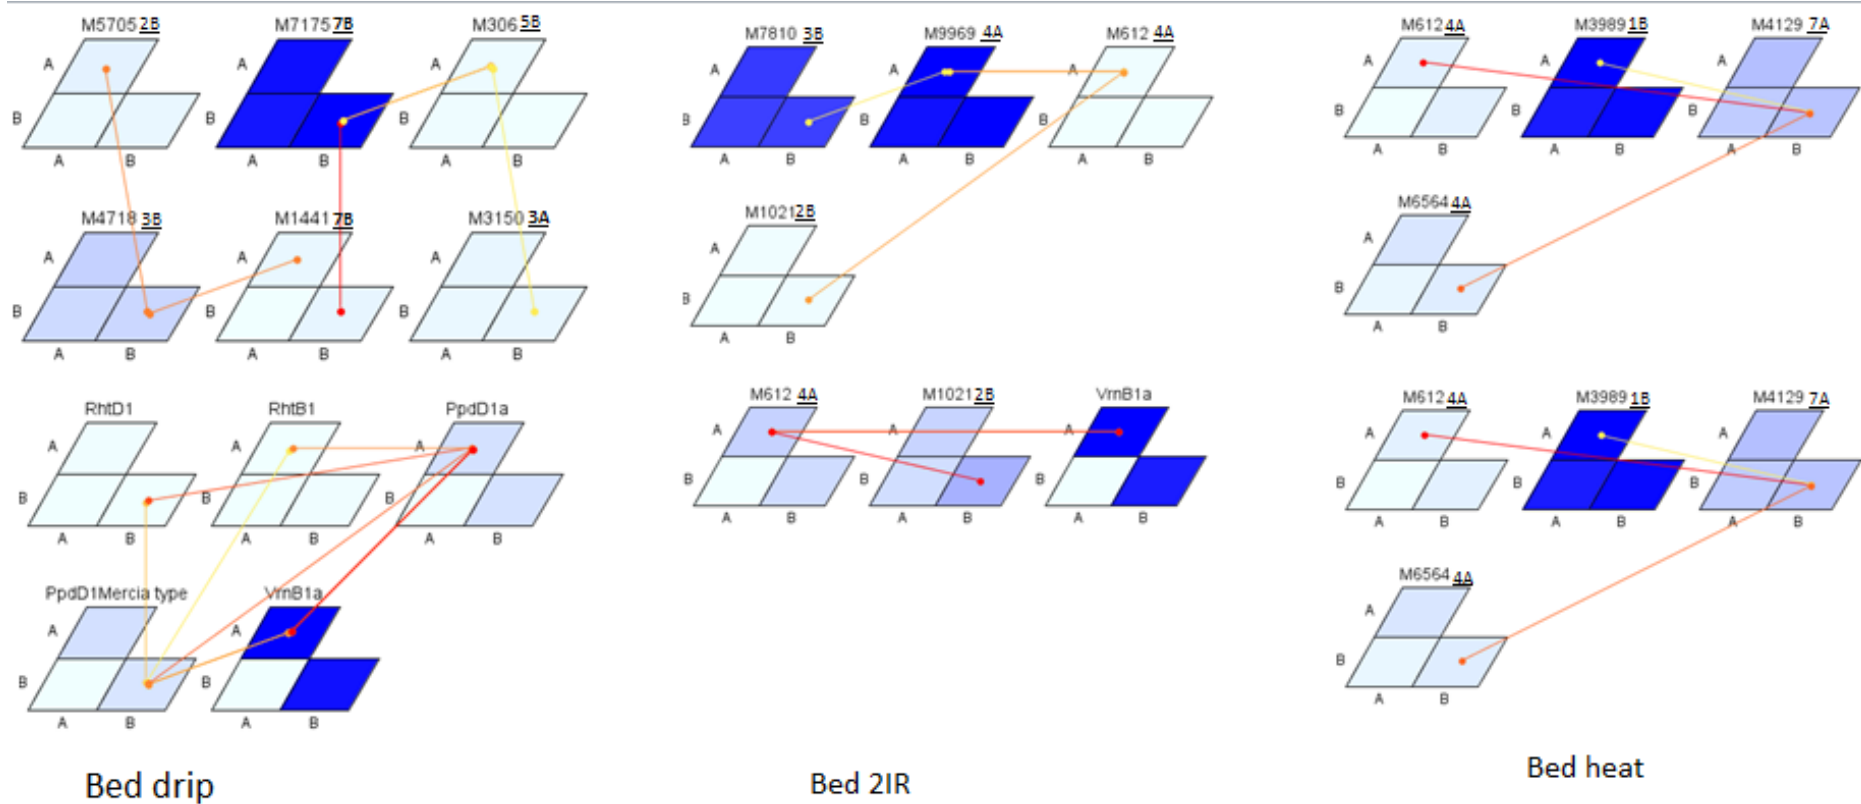

Supplementary Fig. S6 For each of the stressed conditions, epistatic interactions are shown without (above) and with major genes (below) included in the model. Each matrix indicates one marker. The A and B are the two alleles for each marker. The magnitude of marker effect (F value) is represented with shades of blue. The magnitude of epistatic interaction is presented with colors from yellow to red (stronger interaction).

Supplementary Table S1 Genotypes used in the present study

| S. No. | GID     | Cross Name                                                                           |
|--------|---------|--------------------------------------------------------------------------------------|
| 1      | 4785245 | GAN/AE.SQUARROSA (236)//CETA/AE.SQUARROSA (895)/3/MAIZ/4/INQALAB 91                  |
| 2      | 5866000 | MEX94.27.1.20/3/SOKOLL//ATTILA/3*BCN                                                 |
| 3      | 5893304 | SERI/BAV92//WBLL1                                                                    |
| 4      | 5893342 | PUB94.15.1.12/FRTL                                                                   |
| 5      | 5895861 | PASTOR//HXL7573/2*BAU/3/WBLL1                                                        |
| 6      | 5895868 | SERI/BAV92//WBLL1                                                                    |
| 7      | 6085788 | QUAIU #1                                                                             |
| 8      | 6085793 | QUAIU #1                                                                             |
| 9      | 6085804 | KIRITATI//HUW234+LR34/PRINIA                                                         |
| 10     | 6174798 | MILAN/S87230//BAV92/3/ROLF07                                                         |
| 11     | 6174802 | SAUAL/KACHU                                                                          |
| 12     | 6174807 | SAUAL/KACHU                                                                          |
| 13     | 6174819 | CNO79//PF70354/MUS/3/PASTOR/4/BAV92/5/TACUPETO F2001*2/BRAMBLING                     |
| 14     | 6174820 | CNO79//PF70354/MUS/3/PASTOR/4/BAV92/5/TACUPETO F2001*2/BRAMBLING                     |
| 15     | 6174828 | TACUPETO F2001/3/FRET2/WBLL1//TACUPETO F2001                                         |
| 16     | 6174847 | TACUPETO F2001*2/BRAMBLING//WBLL1*2/BRAMBLING                                        |
| 17     | 6174858 | FRANCOLIN #1/WBLL1                                                                   |
| 18     | 6174859 | FRANCOLIN #1/WBLL1                                                                   |
| 19     | 6174860 | FRANCOLIN #1//WBLL1*2/BRAMBLING                                                      |
| 20     | 6174867 | WBLL1*2/BRAMBLING/5/WBLL1*2/4/SNI/TRAP#1/3/KAUZ*2/TRAP//KAUZ                         |
| 21     | 6174868 | WBLL1*2/BRAMBLING/5/WBLL1*2/4/SNI/TRAP#1/3/KAUZ*2/TRAP//KAUZ                         |
| 22     | 6174876 | WBLL1*2/BRAMBLING//KACHU                                                             |
| 23     | 6174877 | WBLL1*2/4/SNI/TRAP#1/3/KAUZ*2/TRAP//KAUZ/5/WAXWING/4/SNI/TRAP#1/3/KAUZ*2/TRAP//KAUZ  |
| 24     | 6174880 | BECARD/KACHU                                                                         |
| 25     | 6174882 | BECARD/KACHU                                                                         |
| 26     | 6174884 | BECARD/KACHU                                                                         |
| 27     | 6174886 | BECARD/KACHU                                                                         |
| 28     | 6174887 | BECARD/KACHU                                                                         |
| 29     | 6174889 | BECARD/KACHU                                                                         |
| 30     | 6174890 | BECARD/KACHU                                                                         |
| 31     | 6174891 | FRANCOLIN #1//WBLL1*2/KIRITATI                                                       |
| 32     | 6174892 | FRANCOLIN #1//WBLL1*2/KURUKU                                                         |
| 33     | 6174895 | ALTAR 84/AE.SQUARROSA (221)//3*BORL95/3/URES/JUN//KAUZ/4/WBLL1/5/MILAN/S87230//BAV92 |
| 34     | 6174896 | ALTAR 84/AE.SQUARROSA (221)//3*BORL95/3/URES/JUN//KAUZ/4/WBLL1/5/MILAN/S87230//BAV92 |
| 35     | 6174901 | ALTAR 84/AE.SQUARROSA (221)//3*BORL95/3/URES/JUN//KAUZ/4/WBLL1/5/MILAN/S87230//BAV92 |
| 36     | 6174903 | ALTAR 84/AE.SQUARROSA (221)//3*BORL95/3/URES/JUN//KAUZ/4/WBLL1/5/MILAN/S87230//BAV92 |
| 37     | 6174904 | ALTAR 84/AE.SQUARROSA (221)//3*BORL95/3/URES/JUN//KAUZ/4/WBLL1/5/MILAN/S87230//BAV92 |
| 38     | 6174926 | WBLL1*2/BRAMBLING//HEILO                                                             |
| 39     | 6174927 | WBLL1*2/BRAMBLING//FN/2*PASTOR                                                       |
| 40     | 6174949 | QUAIU #3//MILAN/AMSEL                                                                |



---

|    |         |                                                                                                                                            |
|----|---------|--------------------------------------------------------------------------------------------------------------------------------------------|
| 41 | 6174951 | QUAIU #3//MILAN/AMSEL                                                                                                                      |
| 42 | 6174952 | QUAIU #3//MILAN/AMSEL                                                                                                                      |
| 43 | 6174993 | ATTILA*2/PBW65*2//TOBA97/PASTOR                                                                                                            |
| 44 | 6175002 | ATTILA*2/PBW65*2//KRONSTAD F2004                                                                                                           |
| 45 | 6175005 | ATTILA*2/PBW65*2//KRONSTAD F2004                                                                                                           |
| 46 | 6175009 | KAUZ/PASTOR//PBW343/3/FRET2/KURUKU//FRET2/4/WBLL1*2/BRAMBLING                                                                              |
| 47 | 6175010 | KAUZ/PASTOR//PBW343/3/FRET2/KURUKU//FRET2/4/WBLL1*2/BRAMBLING                                                                              |
| 48 | 6175022 | ROLF07*2/5/REH/HARE//2*BCN/3/CROC_1/AE.SQUARROSA (213)//PGO/4/HUITES                                                                       |
| 49 | 6175024 | TACUPETO F2001/BRAMBLING*2//KACHU                                                                                                          |
| 50 | 6175025 | TACUPETO F2001/BRAMBLING*2//KACHU                                                                                                          |
| 51 | 6175030 | TACUPETO F2001/BRAMBLING*2//KACHU                                                                                                          |
| 52 | 6175035 | TACUPETO F2001/BRAMBLING*2//KACHU                                                                                                          |
| 53 | 6175036 | TACUPETO F2001/BRAMBLING*2//KACHU                                                                                                          |
| 54 | 6175038 | TACUPETO F2001/BRAMBLING*2//KACHU                                                                                                          |
| 55 | 6175042 | WBLL1*2/KKTS/3/FRET2/TUKURU//FRET2/4/WBLL1*2/KURUKU                                                                                        |
| 56 | 6175044 | WBLL1*2/KURUKU/3/FRET2/TUKURU//FRET2/4/WBLL1*2/KURUKU                                                                                      |
| 57 | 6175046 | WBLL1*2/KURUKU/3/FRET2/TUKURU//FRET2/4/WBLL1*2/KURUKU                                                                                      |
| 58 | 6175048 | WBLL1*2/KURUKU/3/FRET2/TUKURU//FRET2/4/WBLL1*2/KURUKU                                                                                      |
| 59 | 6175056 | WBLL1*2/TUKURU//SAUAL/3/WBLL1*2/BRAMBLING                                                                                                  |
| 60 | 6175057 | WBLL1*2/VIVITSI//PRINIA/PASTOR/3/WBLL1*2/BRAMBLING                                                                                         |
| 61 | 6175063 | NAC/TH.AC//3*PVN/3/MIRLO/BUC/4/2*PASTOR/5/KACHU/6/KACHU                                                                                    |
| 62 | 6175067 | NAC/TH.AC//3*PVN/3/MIRLO/BUC/4/2*PASTOR/5/KACHU/6/KACHU                                                                                    |
| 63 | 6175076 | NAC/TH.AC//3*PVN/3/MIRLO/BUC/4/2*PASTOR/5/KACHU/6/KACHU                                                                                    |
| 64 | 6175078 | SAUAL/5/REH/HARE//2*BCN/3/CROC_1/AE.SQUARROSA (213)//PGO/4/HUITES/6/KACHU                                                                  |
| 65 | 6175127 | SITE/MO//PASTOR/3/TILHI/4/WAXWING/KIRITATI/5/PBW343*2/TUKURU<br>ALTAR 84/AE.SQUARROSA                                                      |
| 66 | 6175135 | (221)//3*BORL95/3/URES/JUN//KAUZ/4/WBLL1*2/5/REH/HARE//2*BCN/3/CROC_1/AE.SQUARROSA<br>(213)//PGO/4/HUITES                                  |
| 67 | 6175171 | YAV_3/SCO//JO69/CRA/3/YAV79/4/AE.SQUARROSA (498)/5/LINE<br>1073/6/KAUZ*2/4/CAR//KAL/BB/3/NAC/5/KAUZ/7/KRONSTAD F2004/8/KAUZ/PASTOR//PBW343 |
| 68 | 6175172 | YAV_3/SCO//JO69/CRA/3/YAV79/4/AE.SQUARROSA (498)/5/LINE<br>1073/6/KAUZ*2/4/CAR//KAL/BB/3/NAC/5/KAUZ/7/KRONSTAD F2004/8/KAUZ/PASTOR//PBW343 |
| 69 | 6175173 | YAV_3/SCO//JO69/CRA/3/YAV79/4/AE.SQUARROSA (498)/5/LINE<br>1073/6/KAUZ*2/4/CAR//KAL/BB/3/NAC/5/KAUZ/7/KRONSTAD F2004/8/KAUZ/PASTOR//PBW343 |
| 70 | 6175174 | YAV_3/SCO//JO69/CRA/3/YAV79/4/AE.SQUARROSA (498)/5/LINE<br>1073/6/KAUZ*2/4/CAR//KAL/BB/3/NAC/5/KAUZ/7/KRONSTAD F2004/8/KAUZ/PASTOR//PBW343 |
| 71 | 6175175 | YAV_3/SCO//JO69/CRA/3/YAV79/4/AE.SQUARROSA (498)/5/LINE<br>1073/6/KAUZ*2/4/CAR//KAL/BB/3/NAC/5/KAUZ/7/KRONSTAD F2004/8/KAUZ/PASTOR//PBW343 |
| 72 | 6175176 | YAV_3/SCO//JO69/CRA/3/YAV79/4/AE.SQUARROSA (498)/5/LINE<br>1073/6/KAUZ*2/4/CAR//KAL/BB/3/NAC/5/KAUZ/7/KRONSTAD F2004/8/KAUZ/PASTOR//PBW343 |
| 73 | 6175178 | YAV_3/SCO//JO69/CRA/3/YAV79/4/AE.SQUARROSA (498)/5/LINE<br>1073/6/KAUZ*2/4/CAR//KAL/BB/3/NAC/5/KAUZ/7/KRONSTAD F2004/8/KAUZ/PASTOR//PBW343 |
| 74 | 6175181 | WAXWING/KIRITATI//FINSI/3/FRANCOLIN #1                                                                                                     |
| 75 | 6175202 | ATTILA*2/PBW65*2//MURGA                                                                                                                    |
| 76 | 6175205 | ATTILA*2/PBW65*2//MURGA                                                                                                                    |
| 77 | 6175208 | ATTILA*2/PBW65*2/5/REH/HARE//2*BCN/3/CROC_1/AE.SQUARROSA (213)//PGO/4/HUITES                                                               |
| 78 | 6175209 | ATTILA*2/PBW65*2/5/REH/HARE//2*BCN/3/CROC_1/AE.SQUARROSA (213)//PGO/4/HUITES                                                               |
| 79 | 6175210 | ATTILA*2/PBW65*2/5/REH/HARE//2*BCN/3/CROC_1/AE.SQUARROSA (213)//PGO/4/HUITES                                                               |
| 80 | 6175211 | ATTILA*2/PBW65*2/5/REH/HARE//2*BCN/3/CROC_1/AE.SQUARROSA (213)//PGO/4/HUITES                                                               |

---

---

|     |         |                                                                                                                             |
|-----|---------|-----------------------------------------------------------------------------------------------------------------------------|
| 81  | 6175212 | ATTILA*2/PBW65*2/5/REH/HARE//2*BCN/3/CROC_1/AE.SQUARROSA (213)//PGO/4/HUITES                                                |
| 82  | 6175213 | ATTILA*2/PBW65*2/5/REH/HARE//2*BCN/3/CROC_1/AE.SQUARROSA (213)//PGO/4/HUITES                                                |
| 83  | 6175216 | WAXWING/4/BL 1496/MILAN/3/CROC_1/AE.SQUARROSA (205)//KAUZ/5/FRNCLN                                                          |
| 84  | 6175229 | TOBA97/ATTILA/4/CROC_1/AE.SQUARROSA<br>(205)//KAUZ/3/2*PJN/BOW//OPATA/5/THELIN/3/BABAX/LR42//BABAX/4/BABAX/LR42//BABAX      |
| 85  | 6175232 | WBLL1*2/KURUKU/6/CNDO/R143//ENTE/MEXI_2/3/AEGILOPS SQUARROSA<br>(TAUS)/4/WEAVER/5/2*JANZ/7/WBLL1*2/KURUKU                   |
| 86  | 6175233 | WBLL1*2/KURUKU/6/CNDO/R143//ENTE/MEXI_2/3/AEGILOPS SQUARROSA<br>(TAUS)/4/WEAVER/5/2*JANZ/7/WBLL1*2/KURUKU                   |
| 87  | 6175234 | WBLL1*2/KURUKU/6/CNDO/R143//ENTE/MEXI_2/3/AEGILOPS SQUARROSA<br>(TAUS)/4/WEAVER/5/2*JANZ/7/WBLL1*2/KURUKU                   |
| 88  | 6175235 | WBLL1*2/KURUKU/6/CNDO/R143//ENTE/MEXI_2/3/AEGILOPS SQUARROSA<br>(TAUS)/4/WEAVER/5/2*JANZ/7/WBLL1*2/KURUKU                   |
| 89  | 6175268 | HUW468*2//TOBA97/PASTOR                                                                                                     |
| 90  | 6175279 | PBW343*2/KHVAKI*2/4/CROC_1/AE.SQUARROSA (205)//KAUZ/3/2*KAUZ*2/YACO//KAUZ                                                   |
| 91  | 6175280 | PBW343*2/KHVAKI*2/4/CROC_1/AE.SQUARROSA (205)//KAUZ/3/2*KAUZ*2/YACO//KAUZ                                                   |
| 92  | 6175284 | PBW343*2/KUKUNA*2/4/CROC_1/AE.SQUARROSA (205)//BORL95/3/2*MILAN                                                             |
| 93  | 6175296 | UP2338*2/4/SNI/TRAP#1/3/KAUZ*2/TRAP//KAUZ/5/2*WAXWING/4/SNI/TRAP#1/3/KAUZ*2/TRAP//KAUZ                                      |
| 94  | 6175297 | UP2338*2/4/SNI/TRAP#1/3/KAUZ*2/TRAP//KAUZ/5/2*WAXWING/4/SNI/TRAP#1/3/KAUZ*2/TRAP//KAUZ                                      |
| 95  | 6175301 | UP2338*2/4/SNI/TRAP#1/3/KAUZ*2/TRAP//KAUZ/5/2*WAXWING/4/SNI/TRAP#1/3/KAUZ*2/TRAP//KAUZ                                      |
| 96  | 6175310 | SERI1B*2/3/KAUZ*2/BOW//KAUZ*2/5/REH/HARE//2*BCN/3/CROC_1/AE.SQUARROSA (213)//PGO/4/HUITES                                   |
| 97  | 6175312 | TUKURU//BAV92/RAYON*2/7/YAV_3/SCO//JO69/CRA/3/YAV79/4/AE.SQUARROSA (498)/5/LINE<br>1073/6/KAUZ*2/4/CAR//KAL/BB/3/NAC/5/KAUZ |
| 98  | 6175345 | TACUPETO F2001/6/OASIS/5*BORL95/5/CNDO/R143//ENTE/MEXI75/3/AE.SQ/4/2*OCI/7/ROLF07                                           |
| 99  | 6175354 | WAXWING/VORB//FRANCOLIN #1                                                                                                  |
| 100 | 6175358 | BAV92//IRENA/KAUZ/3/HUITES*2/4/VORB                                                                                         |
| 101 | 6175359 | WBLL1*2/VIVITSI//VORB/3/WBLL1*2/BRAMBLING                                                                                   |
| 102 | 6175361 | WBLL1*2/VIVITSI//VORB/3/WBLL1*2/BRAMBLING                                                                                   |
| 103 | 6175382 | NG8675/CBRD//FN/2*PASTOR/4/THELIN/3/2*BABAX/LR42//BABAX                                                                     |
| 104 | 6175409 | WAXWING*2/HEILO                                                                                                             |
| 105 | 6175410 | WAXWING*2/HEILO                                                                                                             |
| 106 | 6175411 | WAXWING*2/HEILO                                                                                                             |
| 107 | 6175412 | WAXWING*2/HEILO                                                                                                             |
| 108 | 6175413 | WAXWING*2/HEILO                                                                                                             |
| 109 | 6175417 | WAXWING*2/HEILO                                                                                                             |
| 110 | 6175431 | TOBA97/ATTILA//GONDO/3/FRANCOLIN #1                                                                                         |
| 111 | 6175439 | BAV92//IRENA/KAUZ/3/HUITES/4/GONDO/TNMU/5/BAV92//IRENA/KAUZ/3/HUITES                                                        |
| 112 | 6175440 | BAV92//IRENA/KAUZ/3/HUITES/4/GONDO/TNMU/5/BAV92//IRENA/KAUZ/3/HUITES                                                        |
| 113 | 6175442 | BAV92//IRENA/KAUZ/3/HUITES/4/GONDO/TNMU/5/BAV92//IRENA/KAUZ/3/HUITES                                                        |
| 114 | 6175444 | BAV92//IRENA/KAUZ/3/HUITES/4/GONDO/TNMU/5/BAV92//IRENA/KAUZ/3/HUITES                                                        |
| 115 | 6175454 | WBLL1*2/4/YACO/PBW65/3/KAUZ*2/TRAP//KAUZ/5/GONDO/6/WBLL1*2/4/SNI/TRAP#1/3/KAUZ*2/TRAP//K<br>AUZ                             |
| 116 | 6175471 | WBLL1*2/KURUKU//HEILO/3/WBLL1*2/KURUKU                                                                                      |
| 117 | 6175474 | WBLL1*2/KURUKU//HEILO/3/WBLL1*2/KURUKU                                                                                      |
| 118 | 6175491 | SSERII/CHIBIA/4/BAV92//IRENA/KAUZ/3/HUITES                                                                                  |
| 119 | 6175493 | SSERII/CHIBIA/4/BAV92//IRENA/KAUZ/3/HUITES                                                                                  |
| 120 | 6175497 | TUKURU//BAV92/RAYON/3/KRONSTAD F2004                                                                                        |
| 121 | 6175500 | ATTILA*2/PBW65//WBLL1*2/VIVITSI                                                                                             |

---

---

|     |         |                                                                                                                                  |
|-----|---------|----------------------------------------------------------------------------------------------------------------------------------|
| 122 | 6175531 | FRET2/TUKURU//FRET2/3/KRONSTAD F2004                                                                                             |
| 123 | 6175571 | TACUPETO F2001/BRAMBLING//KACHU                                                                                                  |
| 124 | 6175573 | WBLL1/MUU #1                                                                                                                     |
| 125 | 6175606 | WBLL1/3/STAR//KAUZ/STAR/4/BAV92/RAYON/5/TRAP#1/BOW/3/VEE/PJN//2*TUI/4/BAV92/RAYON                                                |
| 126 | 6175608 | WBLL1/3/STAR//KAUZ/STAR/4/BAV92/RAYON/5/TRAP#1/BOW/3/VEE/PJN//2*TUI/4/BAV92/RAYON                                                |
| 127 | 6175609 | WBLL1/3/STAR//KAUZ/STAR/4/BAV92/RAYON/5/TRAP#1/BOW/3/VEE/PJN//2*TUI/4/BAV92/RAYON                                                |
| 128 | 6175610 | WBLL1/3/STAR//KAUZ/STAR/4/BAV92/RAYON/5/TRAP#1/BOW/3/VEE/PJN//2*TUI/4/BAV92/RAYON                                                |
| 129 | 6175651 | SAUAL/KRONSTAD F2004                                                                                                             |
| 130 | 6175652 | SAUAL/KRONSTAD F2004                                                                                                             |
| 131 | 6175653 | SAUAL/KRONSTAD F2004                                                                                                             |
| 132 | 6175657 | PRINIA/PASTOR/3/PFAU/WEAVER*2//BRAMBLING                                                                                         |
| 133 | 6175659 | PRINIA/PASTOR/3/PFAU/WEAVER*2//BRAMBLING                                                                                         |
| 134 | 6175660 | PRINIA/PASTOR/3/PFAU/WEAVER*2//BRAMBLING                                                                                         |
| 135 | 6175662 | SITE/MO//PASTOR/3/TILHI/4/WAXWING/KIRITATI                                                                                       |
| 136 | 6175667 | ALTAR 84/AE.SQUARROSA<br>(221)//3*BORL95/3/URES/JUN//KAUZ/4/WBLL1/5/REH/HARE//2*BCN/3/CROC_1/AE.SQUARROSA<br>(213)//PGO/4/HUITES |
| 137 | 6175668 | ALTAR 84/AE.SQUARROSA<br>(221)//3*BORL95/3/URES/JUN//KAUZ/4/WBLL1/5/REH/HARE//2*BCN/3/CROC_1/AE.SQUARROSA<br>(213)//PGO/4/HUITES |
| 138 | 6175669 | ALTAR 84/AE.SQUARROSA<br>(221)//3*BORL95/3/URES/JUN//KAUZ/4/WBLL1/5/REH/HARE//2*BCN/3/CROC_1/AE.SQUARROSA<br>(213)//PGO/4/HUITES |
| 139 | 6175679 | MURGA/WAXWING/KIRITATI                                                                                                           |
| 140 | 6175680 | MURGA/WAXWING/KIRITATI                                                                                                           |
| 141 | 6175694 | MURGA/KRONSTAD F2004                                                                                                             |
| 142 | 6175697 | MURGA/KRONSTAD F2004                                                                                                             |
| 143 | 6175704 | MURGA/KRONSTAD F2004                                                                                                             |
| 144 | 6175705 | MURGA/KRONSTAD F2004                                                                                                             |
| 145 | 6175707 | MURGA/KRONSTAD F2004                                                                                                             |
| 146 | 6175708 | MURGA/KRONSTAD F2004                                                                                                             |
| 147 | 6175717 | REH/HARE//2*BCN/3/CROC_1/AE.SQUARROSA (213)//PGO/4/HUITES/5/KRONSTAD F2004                                                       |
| 148 | 6175718 | REH/HARE//2*BCN/3/CROC_1/AE.SQUARROSA (213)//PGO/4/HUITES/5/KRONSTAD F2004                                                       |
| 149 | 6175720 | REH/HARE//2*BCN/3/CROC_1/AE.SQUARROSA (213)//PGO/4/HUITES/5/KRONSTAD F2004                                                       |
| 150 | 6175721 | REH/HARE//2*BCN/3/CROC_1/AE.SQUARROSA (213)//PGO/4/HUITES/5/KRONSTAD F2004                                                       |
| 151 | 6175740 | ATTILA*2/PBW65//MURGA                                                                                                            |
| 152 | 6175744 | ATTILA*2/PBW65//MURGA                                                                                                            |
| 153 | 6175757 | BAV92//IRENA/KAUZ/3/HUITES/6/ALD/CEP75630//CEP75234/PT7219/3/BUC/BJY/4/CBRD/5/TNMU/PF85487                                       |
| 154 | 6175758 | BAV92//IRENA/KAUZ/3/HUITES/6/ALD/CEP75630//CEP75234/PT7219/3/BUC/BJY/4/CBRD/5/TNMU/PF85487                                       |
| 155 | 6175897 | WBLL1*2/CHAPIO//HEILO                                                                                                            |
| 156 | 6175899 | WBLL1*2/CHAPIO//HEILO                                                                                                            |
| 157 | 6175900 | WBLL1*2/CHAPIO//HEILO                                                                                                            |
| 158 | 6175902 | WBLL1*2/CHAPIO//HEILO                                                                                                            |
| 159 | 6175930 | WBLL1*2/KURUKU//HEILO                                                                                                            |
| 160 | 6175941 | WBLL1*2/KURUKU//HEILO                                                                                                            |
| 161 | 6175947 | WBLL1*2/KURUKU//HEILO                                                                                                            |

---

---

|     |         |                                                                                                                 |
|-----|---------|-----------------------------------------------------------------------------------------------------------------|
| 162 | 6175958 | ATTILA*2/PBW65*2//KACHU                                                                                         |
| 163 | 6175962 | ATTILA*2/PBW65*2//KACHU                                                                                         |
| 164 | 6175963 | ATTILA*2/PBW65*2//KACHU                                                                                         |
| 165 | 6175970 | ATTILA*2/PBW65*2//MESIA                                                                                         |
| 166 | 6175974 | ATTILA*2/PBW65*2/4/CROC_1/AE.SQUARROSA (205)//BORL95/3/2*MILAN                                                  |
| 167 | 6175976 | ATTILA*2/PBW65*2/4/CROC_1/AE.SQUARROSA (205)//BORL95/3/2*MILAN                                                  |
| 168 | 6175979 | ATTILA*2/PBW65*2/4/CROC_1/AE.SQUARROSA (205)//BORL95/3/2*MILAN                                                  |
| 169 | 6175982 | ATTILA*2/PBW65*2/4/CROC_1/AE.SQUARROSA (205)//BORL95/3/2*MILAN                                                  |
| 170 | 6175983 | ATTILA*2/PBW65*2/4/CROC_1/AE.SQUARROSA (205)//BORL95/3/2*MILAN                                                  |
| 171 | 6175986 | ATTILA*2/PBW65*2/4/CROC_1/AE.SQUARROSA (205)//BORL95/3/2*MILAN                                                  |
| 172 | 6175989 | WAXWING*2/4/BOW/NKT//CBRD/3/CBRD                                                                                |
| 173 | 6175997 | BABAX/LR42//BABAX/3/BABAX/LR42//BABAX/4/PRINIA/PASTOR//HUITES/5/FRET2/WBLL1//TACUPETO F2001                     |
| 174 | 6176013 | ROLF07/4/BOW/NKT//CBRD/3/CBRD/5/FRET2/TUKURU//FRET2                                                             |
| 175 | 6176017 | ROLF07*2/4/BOW/NKT//CBRD/3/CBRD                                                                                 |
| 176 | 6176021 | ROLF07*2/3/PRINIA/PASTOR//HUITES                                                                                |
| 177 | 6176022 | ROLF07*2/3/PRINIA/PASTOR//HUITES                                                                                |
| 178 | 6176023 | ROLF07*2/4/CROC_1/AE.SQUARROSA (205)//BORL95/3/2*MILAN                                                          |
| 179 | 6176024 | ROLF07*2/4/CROC_1/AE.SQUARROSA (205)//BORL95/3/2*MILAN                                                          |
| 180 | 6176031 | WBLL1*2/4/SNI/TRAP#1/3/KAUZ*2/TRAP//KAUZ/5/PFAU/WEAVER//BRAMBLING/6/BAV92//IRENA/KAUZ/3/HUITES                  |
| 181 | 6176039 | WBLL1*2/4/YACO/PBW65/3/KAUZ*2/TRAP//KAUZ*2/6/NG8201/KAUZ/4/SHA7//PRL/VEE#6/3/FASAN/5/MILAN/KAUZ                 |
| 182 | 6176043 | WBLL1*2/KKTS*2//MILAN/AMSEL                                                                                     |
| 183 | 6176045 | WBLL1*2/KUKUNA/5/PSN/BOW//SERI/3/MILAN/4/ATTILA/6/WBLL1*2/KKTS                                                  |
| 184 | 6176047 | WBLL1*2/KUKUNA/5/PSN/BOW//SERI/3/MILAN/4/ATTILA/6/WBLL1*2/KKTS                                                  |
| 185 | 6176049 | WBLL1*2/KUKUNA/5/PSN/BOW//SERI/3/MILAN/4/ATTILA/6/WBLL1*2/KKTS                                                  |
| 186 | 6176050 | WBLL1*2/TUKURU*2/4/CROC_1/AE.SQUARROSA (205)//BORL95/3/2*MILAN                                                  |
| 187 | 6176051 | WBLL1*2/TUKURU*2/4/CROC_1/AE.SQUARROSA (205)//BORL95/3/2*MILAN                                                  |
| 188 | 6176054 | WBLL1*2/TUKURU*2/4/CROC_1/AE.SQUARROSA (205)//BORL95/3/2*MILAN                                                  |
| 189 | 6176056 | WBLL1*2/TUKURU*2/4/CROC_1/AE.SQUARROSA (205)//BORL95/3/2*MILAN                                                  |
| 190 | 6176134 | BAV92//IRENA/KAUZ/3/HUITES*2/4/TNMU                                                                             |
| 191 | 6176139 | BAV92//IRENA/KAUZ/3/HUITES*2/4/TNMU                                                                             |
| 192 | 6176149 | NORM/WBLL1//WBLL1/3/TNMU/4/WBLL1*2/TUKURU                                                                       |
| 193 | 6176173 | UP2338*2/4/SNI/TRAP#1/3/KAUZ*2/TRAP//KAUZ/5/MILAN/KAUZ//CHIL/CHUM18/6/UP2338*2/4/SNI/TRAP#1/3/KAUZ*2/TRAP//KAUZ |
| 194 | 6176174 | UP2338*2/4/SNI/TRAP#1/3/KAUZ*2/TRAP//KAUZ/5/MILAN/KAUZ//CHIL/CHUM18/6/UP2338*2/4/SNI/TRAP#1/3/KAUZ*2/TRAP//KAUZ |
| 195 | 6176178 | UP2338*2/4/SNI/TRAP#1/3/KAUZ*2/TRAP//KAUZ/5/MILAN/KAUZ//CHIL/CHUM18/6/UP2338*2/4/SNI/TRAP#1/3/KAUZ*2/TRAP//KAUZ |
| 196 | 6176187 | WAXWING/2*ROLF07                                                                                                |
| 197 | 6176189 | WAXWING/2*ROLF07                                                                                                |
| 198 | 6176196 | BAV92//IRENA/KAUZ/3/HUITES/4/2*ROLF07                                                                           |
| 199 | 6176208 | BAV92//IRENA/KAUZ/3/HUITES/4/2*ROLF07                                                                           |
| 200 | 6176213 | BAV92//IRENA/KAUZ/3/HUITES/4/2*ROLF07                                                                           |
| 201 | 6176224 | FRET2/TUKURU//FRET2/3/MUNIA/CHTO//AMSEL/4/FRET2/TUKURU//FRET2                                                   |
| 202 | 6176225 | FRET2/TUKURU//FRET2/3/MUNIA/CHTO//AMSEL/4/FRET2/TUKURU//FRET2                                                   |

---

---

|     |         |                                                                             |
|-----|---------|-----------------------------------------------------------------------------|
| 203 | 6176228 | FRET2/TUKURU//FRET2/3/MUNIA/CHTO//AMSEL/4/FRET2/TUKURU//FRET2               |
| 204 | 6176233 | ROLF07*2/KACHU                                                              |
| 205 | 6176235 | ROLF07*2/KACHU                                                              |
| 206 | 6176292 | ATTILA*2/PBW65*2//MURGA                                                     |
| 207 | 6176296 | ATTILA*2/PBW65*2//MURGA                                                     |
| 208 | 6176298 | ATTILA*2/PBW65*2//MURGA                                                     |
| 209 | 6176303 | ATTILA*2/PBW65*2//MURGA                                                     |
| 210 | 6176308 | ATTILA*2/PBW65*2//MURGA                                                     |
| 211 | 6176328 | BAV92//IRENA/KAUZ/3/HUITES*2/4/MURGA                                        |
| 212 | 6176329 | BAV92//IRENA/KAUZ/3/HUITES*2/4/MURGA                                        |
| 213 | 6176330 | BAV92//IRENA/KAUZ/3/HUITES*2/4/MURGA                                        |
| 214 | 6176332 | BAV92//IRENA/KAUZ/3/HUITES*2/4/MURGA                                        |
| 215 | 6176334 | ROLF07*2/5/REH/HARE//2*BCN/3/CROC_1/AE.SQUARROSA (213)//PGO/4/HUITES        |
| 216 | 6176335 | WBL1*2/CHAPIO*2//MURGA                                                      |
| 217 | 6176336 | WBL1*2/CHAPIO*2//MURGA                                                      |
| 218 | 6176339 | WBL1*2/CHAPIO*2//MURGA                                                      |
| 219 | 6176341 | WBL1*2/CHAPIO*2//MURGA                                                      |
| 220 | 6176344 | WBL1*2/CHAPIO*2//MURGA                                                      |
| 221 | 6176346 | WBL1*2/KURUKU*2/5/REH/HARE//2*BCN/3/CROC_1/AE.SQUARROSA (213)//PGO/4/HUITES |
| 222 | 6176355 | WBL1*2/KURUKU*2/5/REH/HARE//2*BCN/3/CROC_1/AE.SQUARROSA (213)//PGO/4/HUITES |
| 223 | 6176359 | WBL1/FRET2//PASTOR*2/3/MURGA                                                |
| 224 | 6176360 | WBL1/FRET2//PASTOR*2/3/MURGA                                                |
| 225 | 6176361 | WBL1/FRET2//PASTOR*2/3/MURGA                                                |
| 226 | 6176368 | KACHU/4/CROC_1/AE.SQUARROSA (205)//BORL95/3/2*MILAN/5/KACHU                 |
| 227 | 6176372 | KACHU/4/CROC_1/AE.SQUARROSA (205)//BORL95/3/2*MILAN/5/KACHU                 |
| 228 | 6176395 | KACHU/5/REH/HARE//2*BCN/3/CROC_1/AE.SQUARROSA (213)//PGO/4/HUITES/6/KACHU   |
| 229 | 6176403 | SAUAL/4/CROC_1/AE.SQUARROSA (205)//BORL95/3/2*MILAN/5/SAUAL                 |
| 230 | 6176409 | ATTILA*2/PBW65*2//W485/HD29                                                 |
| 231 | 6176410 | ATTILA*2/PBW65*2//W485/HD29                                                 |
| 232 | 6176414 | ATTILA*2/PBW65*2//W485/HD29                                                 |
| 233 | 6176421 | WAXWING/KIRITATI*2//W485/HD29                                               |
| 234 | 6176422 | BAV92//IRENA/KAUZ/3/HUITES*2/4/CROC_1/AE.SQUARROSA (224)//KULIN/3/WESTONIA  |
| 235 | 6176423 | BAV92//IRENA/KAUZ/3/HUITES*2/4/CROC_1/AE.SQUARROSA (224)//KULIN/3/WESTONIA  |
| 236 | 6176424 | BAV92//IRENA/KAUZ/3/HUITES*2/4/CROC_1/AE.SQUARROSA (224)//KULIN/3/WESTONIA  |
| 237 | 6176425 | BAV92//IRENA/KAUZ/3/HUITES*2/4/CROC_1/AE.SQUARROSA (224)//KULIN/3/WESTONIA  |
| 238 | 6176426 | BAV92//IRENA/KAUZ/3/HUITES*2/4/CROC_1/AE.SQUARROSA (224)//KULIN/3/WESTONIA  |
| 239 | 6176427 | BAV92//IRENA/KAUZ/3/HUITES*2/4/CROC_1/AE.SQUARROSA (224)//KULIN/3/WESTONIA  |
| 240 | 6176428 | BAV92//IRENA/KAUZ/3/HUITES*2/4/CROC_1/AE.SQUARROSA (224)//KULIN/3/WESTONIA  |
| 241 | 6176429 | BAV92//IRENA/KAUZ/3/HUITES*2/4/CROC_1/AE.SQUARROSA (224)//KULIN/3/WESTONIA  |
| 242 | 6176431 | ROLF07*2/4/CROC_1/AE.SQUARROSA (224)//KULIN/3/WESTONIA                      |
| 243 | 6176455 | KACHU*2/3/CHUM18/BORL95//CBRD                                               |
| 244 | 6176472 | KACHU/4/CROC_1/AE.SQUARROSA (205)//KAUZ/3/SASIA/5/KACHU                     |
| 245 | 6176474 | KACHU/4/CROC_1/AE.SQUARROSA (205)//KAUZ/3/SASIA/5/KACHU                     |

---

---

|     |         |                                                                                  |
|-----|---------|----------------------------------------------------------------------------------|
| 246 | 6176480 | KACHU/4/CROC_1/AE.SQUARROSA (205)//KAUZ/3/SASIA/5/KACHU                          |
| 247 | 6176482 | KACHU/4/CROC_1/AE.SQUARROSA (205)//KAUZ/3/SASIA/5/KACHU                          |
| 248 | 6176487 | KACHU/4/CROC_1/AE.SQUARROSA (205)//KAUZ/3/SASIA/5/KACHU                          |
| 249 | 6176492 | KACHU/4/CROC_1/AE.SQUARROSA (205)//KAUZ/3/SASIA/5/KACHU                          |
| 250 | 6176502 | SAUAL*2/6/CNDO/R143//ENTE/MEXI_2/3/AEGILOPS SQUARROSA (TAUS)/4/WEAVER/5/2*PASTOR |
| 251 | 6176506 | SAUAL*2/6/CNDO/R143//ENTE/MEXI_2/3/AEGILOPS SQUARROSA (TAUS)/4/WEAVER/5/2*PASTOR |
| 252 | 6176509 | SAUAL*2/6/CNDO/R143//ENTE/MEXI_2/3/AEGILOPS SQUARROSA (TAUS)/4/WEAVER/5/2*PASTOR |
| 253 | 6176522 | SAUAL/4/CROC_1/AE.SQUARROSA (205)//KAUZ/3/ATTILA/5/SAUAL                         |
| 254 | 6176523 | SAUAL/4/CROC_1/AE.SQUARROSA (205)//KAUZ/3/ATTILA/5/SAUAL                         |
| 255 | 6176527 | SAUAL/4/CROC_1/AE.SQUARROSA (205)//KAUZ/3/ATTILA/5/SAUAL                         |
| 256 | 6176533 | SAUAL/4/CROC_1/AE.SQUARROSA (205)//KAUZ/3/ATTILA/5/SAUAL                         |
| 257 | 6176537 | SAUAL/4/CROC_1/AE.SQUARROSA (205)//KAUZ/3/ATTILA/5/SAUAL                         |
| 258 | 6176548 | ATTILA*2/PBW65*2/4/BOW/NKT//CBRD/3/CBRD                                          |
| 259 | 6176551 | ATTILA*2/PBW65*2/4/BOW/NKT//CBRD/3/CBRD                                          |
| 260 | 6176553 | ATTILA*2/PBW65*2/4/BOW/NKT//CBRD/3/CBRD                                          |
| 261 | 6176554 | ATTILA*2/PBW65*2/4/BOW/NKT//CBRD/3/CBRD                                          |
| 262 | 6176556 | ATTILA*2/PBW65*2/4/BOW/NKT//CBRD/3/CBRD                                          |
| 263 | 6176557 | ATTILA*2/PBW65*2/4/BOW/NKT//CBRD/3/CBRD                                          |
| 264 | 6176558 | ATTILA*2/PBW65*2/4/BOW/NKT//CBRD/3/CBRD                                          |
| 265 | 6176559 | ATTILA*2/PBW65*2/4/BOW/NKT//CBRD/3/CBRD                                          |
| 266 | 6176581 | BAV92//IRENA/KAUZ/3/HUITES*2/4/CHIL/CHUM18                                       |
| 267 | 6176582 | BAV92//IRENA/KAUZ/3/HUITES/4/FN/2*PASTOR/5/BAV92//IRENA/KAUZ/3/HUITES            |
| 268 | 6176583 | BAV92//IRENA/KAUZ/3/HUITES/4/FN/2*PASTOR/5/BAV92//IRENA/KAUZ/3/HUITES            |
| 269 | 6176584 | BAV92//IRENA/KAUZ/3/HUITES/4/FN/2*PASTOR/5/BAV92//IRENA/KAUZ/3/HUITES            |
| 270 | 6176588 | BAV92//IRENA/KAUZ/3/HUITES/4/FN/2*PASTOR/5/BAV92//IRENA/KAUZ/3/HUITES            |
| 271 | 6176590 | BAV92//IRENA/KAUZ/3/HUITES*2/4/GONDO/TNMU                                        |
| 272 | 6176591 | BAV92//IRENA/KAUZ/3/HUITES*2/4/GONDO/TNMU                                        |
| 273 | 6176593 | BAV92//IRENA/KAUZ/3/HUITES*2/4/GONDO/TNMU                                        |
| 274 | 6176600 | BAV92//IRENA/KAUZ/3/HUITES*2/4/GONDO/TNMU                                        |
| 275 | 6176601 | BAV92//IRENA/KAUZ/3/HUITES*2/4/GONDO/TNMU                                        |
| 276 | 6176611 | ROLF07*2/4/BOW/NKT//CBRD/3/CBRD                                                  |
| 277 | 6176631 | WBLL1/4/HD2281/TRAP#1/3/KAUZ*2/TRAP//KAUZ/5/TACUPETO F2001*2/6/NING MAI 9558     |
| 278 | 6176638 | WBLL1/KUKUNA//TACUPETO F2001*2/3/SHA3/SERI//SHA4/LIRA                            |
| 279 | 6176639 | WBLL1/KUKUNA//TACUPETO F2001*2/3/SHA3/SERI//SHA4/LIRA                            |
| 280 | 6176640 | WBLL1/KUKUNA//TACUPETO F2001*2/3/SHA3/SERI//SHA4/LIRA                            |
| 281 | 6176641 | WBLL1/KUKUNA//TACUPETO F2001*2/3/SHA3/SERI//SHA4/LIRA                            |
| 282 | 6176647 | WBLL1*2/4/YACO/PBW65/3/KAUZ*2/TRAP//KAUZ*2/5/GONDO                               |
| 283 | 6176652 | WBLL1*2/KURUKU*2//TNMU                                                           |
| 284 | 6176653 | WBLL1*2/KURUKU*2//TNMU                                                           |
| 285 | 6176689 | PFAU/WEAVER*2/4/BOW/NKT//CBRD/3/CBRD                                             |
| 286 | 6176696 | PFAU/WEAVER*2//BRAMBLING/3/KAUZ//TRAP#1/BOW/4/PFAU/WEAVER*2//BRAMBLING           |
| 287 | 6176697 | PFAU/WEAVER*2//BRAMBLING/3/KAUZ//TRAP#1/BOW/4/PFAU/WEAVER*2//BRAMBLING           |
| 288 | 6176730 | SAUAL//CHIL/CHUM18/3/SAUAL                                                       |

---

---

|     |         |                                                                          |
|-----|---------|--------------------------------------------------------------------------|
| 289 | 6176747 | SAUAL/3/MAYOOR//TK SN1081/AE.SQUARROSA (222)/4/SAUAL                     |
| 290 | 6176752 | SAUAL/3/MAYOOR//TK SN1081/AE.SQUARROSA (222)/4/SAUAL                     |
| 291 | 6176829 | SAUAL/3/ACHTAR*3//KANZ/KS85-8-4/4/SAUAL                                  |
| 292 | 6176841 | PBW343*2/KHVAKI*2/3/ACHTAR*3//KANZ/KS85-8-5                              |
| 293 | 6176848 | BAV92//IRENA/KAUZ/3/HUITES*2/4/YUNMAI 47                                 |
| 294 | 6176849 | BAV92//IRENA/KAUZ/3/HUITES*2/4/YUNMAI 47                                 |
| 295 | 6176866 | WBLL1/KUKUNA//TACUPETO F2001*2/3/CHUANMAI 107                            |
| 296 | 6176870 | WBLL1*2/4/YACO/PBW65/3/KAUZ*2/TRAP//KAUZ*2/5/DEMAI 4                     |
| 297 | 6176887 | KACHU/YUNMAI 47//KACHU                                                   |
| 298 | 6176903 | WBLL1*2/5/CNO79//PF70354/MUS/3/PASTOR/4/BAV92                            |
| 299 | 6176904 | WBLL1*2/5/CNO79//PF70354/MUS/3/PASTOR/4/BAV92                            |
| 300 | 6176906 | MUNAL #1/FRANCOLIN #1                                                    |
| 301 | 6176912 | MUNAL #1/FRANCOLIN #1                                                    |
| 302 | 6176914 | MUNAL #1/FRANCOLIN #1                                                    |
| 303 | 6176924 | PAURAQ/3/KIRITATI//PRL/2*PASTOR                                          |
| 304 | 6176929 | PFAU/SERI.1B//AMAD/3/WAXWING/4/KIRITATI//PRL/2*PASTOR                    |
| 305 | 6176982 | CNO79//PF70354/MUS/3/PASTOR/4/BAV92/5/WBLL1*2/BRAMBLING                  |
| 306 | 6176986 | CNO79//PF70354/MUS/3/PASTOR/4/BAV92/5/WBLL1*2/BRAMBLING                  |
| 307 | 6176988 | CNO79//PF70354/MUS/3/PASTOR/4/BAV92/5/WBLL1*2/BRAMBLING                  |
| 308 | 6176995 | QUAIU #1/3/MILAN/S87230//BAV92                                           |
| 309 | 6177005 | WBLL1*2/BRAMBLING/5/BABAX/LR42//BABAX*2/4/SNI/TRAP#1/3/KAUZ*2/TRAP//KAUZ |
| 310 | 6177010 | WBLL1*2/BRAMBLING/5/BABAX/LR42//BABAX*2/4/SNI/TRAP#1/3/KAUZ*2/TRAP//KAUZ |
| 311 | 6177014 | WBLL1*2/BRAMBLING/5/BABAX/LR42//BABAX*2/4/SNI/TRAP#1/3/KAUZ*2/TRAP//KAUZ |
| 312 | 6177015 | WBLL1*2/BRAMBLING/5/BABAX/LR42//BABAX*2/4/SNI/TRAP#1/3/KAUZ*2/TRAP//KAUZ |
| 313 | 6177017 | WBLL1*2/BRAMBLING/5/BABAX/LR42//BABAX*2/4/SNI/TRAP#1/3/KAUZ*2/TRAP//KAUZ |
| 314 | 6177020 | WBLL1*2/BRAMBLING/5/BABAX/LR42//BABAX*2/4/SNI/TRAP#1/3/KAUZ*2/TRAP//KAUZ |
| 315 | 6177024 | WBLL1*2/BRAMBLING/5/BABAX/LR42//BABAX*2/4/SNI/TRAP#1/3/KAUZ*2/TRAP//KAUZ |
| 316 | 6177026 | WBLL1*2/BRAMBLING/5/BABAX/LR42//BABAX*2/4/SNI/TRAP#1/3/KAUZ*2/TRAP//KAUZ |
| 317 | 6177049 | PANDORA/3/KIRITATI//PRL/2*PASTOR                                         |
| 318 | 6177051 | PANDORA/3/KIRITATI//PRL/2*PASTOR                                         |
| 319 | 6177056 | PANDORA//WBLL1*2/BRAMBLING                                               |
| 320 | 6177057 | PANDORA//WBLL1*2/BRAMBLING                                               |
| 321 | 6177058 | PANDORA//WBLL1*2/BRAMBLING                                               |
| 322 | 6177060 | ATTILA*2/PBW65//AKURI                                                    |
| 323 | 6177062 | ATTILA*2/PBW65//AKURI                                                    |
| 324 | 6177080 | ATTILA*2/PBW65//KBIRD                                                    |
| 325 | 6177095 | FRANCOLIN #1/HAWFINCH #1                                                 |
| 326 | 6177099 | FRANCOLIN #1/KIRITATI                                                    |
| 327 | 6177100 | FRANCOLIN #1/KIRITATI                                                    |
| 328 | 6177126 | FRNCLN/TECUE #1                                                          |
| 329 | 6177127 | FRNCLN/TECUE #1                                                          |
| 330 | 6177139 | TRCH/HUIRIVIS #1                                                         |
| 331 | 6177145 | TRCH/HUIRIVIS #1                                                         |

---

---

|     |         |                                                                                  |
|-----|---------|----------------------------------------------------------------------------------|
| 332 | 6177147 | TRCH/HUIRIVIS #1                                                                 |
| 333 | 6177148 | TRCH/HUIRIVIS #1                                                                 |
| 334 | 6177157 | TRCH/KBIRD                                                                       |
| 335 | 6177158 | TRCH/KBIRD                                                                       |
| 336 | 6177159 | TRCH/KBIRD                                                                       |
| 337 | 6177174 | PFAU/SERI.1B//AMAD/3/WAXWING/4/HUIRIVIS #1                                       |
| 338 | 6177175 | PFAU/SERI.1B//AMAD/3/WAXWING/4/MUU                                               |
| 339 | 6177189 | CHIBIA//PRLII/CM65531/3/FISCAL/4/CROSBILL #1                                     |
| 340 | 6177195 | VORB/FISCAL//AKURI #1                                                            |
| 341 | 6177222 | MILAN/S87230//BAV92/3/JUCHI                                                      |
| 342 | 6177233 | MILAN/S87230//BAV92/3/AKURI #1                                                   |
| 343 | 6177257 | PRL/2*PASTOR//CROSBILL #1                                                        |
| 344 | 6177326 | ROLF07/MUU                                                                       |
| 345 | 6177327 | ROLF07/MUU                                                                       |
| 346 | 6177342 | ROLF07/KINGBIRD #1                                                               |
| 347 | 6177369 | WBLL1*2/BRAMBLING//HUIRIVIS #1                                                   |
| 348 | 6177393 | BECARD/AKURI                                                                     |
| 349 | 6177394 | BECARD/AKURI                                                                     |
| 350 | 6177395 | BECARD/AKURI                                                                     |
| 351 | 6177396 | BECARD/AKURI                                                                     |
| 352 | 6177402 | WBLL1*2/KKTS//KINGBIRD #1                                                        |
| 353 | 6177403 | WBLL1*2/KKTS//KINGBIRD #1                                                        |
| 354 | 6177404 | WBLL1*2/KKTS//KINGBIRD #1                                                        |
| 355 | 6177405 | WBLL1*2/KKTS//KINGBIRD #1                                                        |
| 356 | 6177406 | WBLL1*2/KKTS//KINGBIRD #1                                                        |
| 357 | 6177407 | WBLL1*2/KKTS//KINGBIRD #1                                                        |
| 358 | 6177408 | WBLL1*2/KKTS//KINGBIRD #1                                                        |
| 359 | 6177411 | WBLL1*2/KKTS//KINGBIRD #1                                                        |
| 360 | 6177412 | WBLL1*2/KKTS//KINGBIRD #1                                                        |
| 361 | 6177413 | WBLL1*2/KKTS//KINGBIRD #1                                                        |
| 362 | 6177439 | KBIRD//WBLL1*2/KURUKU                                                            |
| 363 | 6177447 | KBIRD//WBLL1*2/KURUKU                                                            |
| 364 | 6177452 | WBLL1/KUKUNA//TACUPETO F2001/6/PVN//CAR422/ANA/5/BOW/CROW//BUC/PVN/3/YR/4/TRAP#1 |
| 365 | 6177453 | WBLL1/KUKUNA//TACUPETO F2001/6/PVN//CAR422/ANA/5/BOW/CROW//BUC/PVN/3/YR/4/TRAP#1 |
| 366 | 6177498 | KACHU/MUU                                                                        |
| 367 | 6177500 | KACHU/MUU                                                                        |
| 368 | 6177509 | KINGBIRD #1/KACHU                                                                |
| 369 | 6177515 | KINGBIRD #1/KACHU                                                                |
| 370 | 6177544 | MILAN/S87230//BAV92/3/AKURI                                                      |
| 371 | 6177551 | TOBA97/PASTOR//KINGBIRD #1                                                       |
| 372 | 6177552 | WAXWING/4/SNI/TRAP#1/3/KAUZ*2/TRAP//KAUZ/5/AKURI                                 |
| 373 | 6177553 | WAXWING/4/SNI/TRAP#1/3/KAUZ*2/TRAP//KAUZ/5/AKURI                                 |
| 374 | 6177554 | WAXWING/4/SNI/TRAP#1/3/KAUZ*2/TRAP//KAUZ/5/AKURI                                 |

---



---

|     |         |                                                                            |
|-----|---------|----------------------------------------------------------------------------|
| 375 | 6177555 | WAXWING/4/SNI/TRAP#1/3/KAUZ*2/TRAP//KAUZ/5/AKURI                           |
| 376 | 6177558 | WAXWING/4/SNI/TRAP#1/3/KAUZ*2/TRAP//KAUZ/5/AKURI                           |
| 377 | 6177560 | WAXWING/4/SNI/TRAP#1/3/KAUZ*2/TRAP//KAUZ/5/AKURI                           |
| 378 | 6177561 | WAXWING/4/SNI/TRAP#1/3/KAUZ*2/TRAP//KAUZ/5/TECUE #1                        |
| 379 | 6177562 | WAXWING/4/SNI/TRAP#1/3/KAUZ*2/TRAP//KAUZ/5/TECUE #1                        |
| 380 | 6177563 | WAXWING/4/SNI/TRAP#1/3/KAUZ*2/TRAP//KAUZ/5/TECUE #1                        |
| 381 | 6177570 | WAXWING/4/SNI/TRAP#1/3/KAUZ*2/TRAP//KAUZ/5/TECUE #1                        |
| 382 | 6177575 | WAXWING/4/SNI/TRAP#1/3/KAUZ*2/TRAP//KAUZ/5/KBIRD                           |
| 383 | 6177576 | WAXWING/4/SNI/TRAP#1/3/KAUZ*2/TRAP//KAUZ/5/KBIRD                           |
| 384 | 6177578 | WAXWING/4/SNI/TRAP#1/3/KAUZ*2/TRAP//KAUZ/5/KBIRD                           |
| 385 | 6177589 | KBIRD//INQALAB 91*2/KUKUNA                                                 |
| 386 | 6177595 | KINGBIRD #1//INQALAB 91*2/TUKURU                                           |
| 387 | 6177598 | KINGBIRD #1//INQALAB 91*2/TUKURU                                           |
| 388 | 6177599 | KINGBIRD #1//INQALAB 91*2/TUKURU                                           |
| 389 | 6177600 | KINGBIRD #1//INQALAB 91*2/TUKURU                                           |
| 390 | 6177603 | KINGBIRD #1//INQALAB 91*2/TUKURU                                           |
| 391 | 6177627 | PBW343*2/KHVAKI/JUCHI                                                      |
| 392 | 6177636 | PBW343*2/KUKUNA//AKURI                                                     |
| 393 | 6177647 | PBW343*2/KUKUNA//TECUE #1                                                  |
| 394 | 6177648 | PBW343*2/KUKUNA//TECUE #1                                                  |
| 395 | 6177650 | PBW343*2/KUKUNA//TECUE #1                                                  |
| 396 | 6177652 | PBW343*2/KUKUNA//TECUE #1                                                  |
| 397 | 6177657 | PBW343*2/KUKUNA//TECUE #1                                                  |
| 398 | 6177659 | PBW343*2/KUKUNA//TECUE #1                                                  |
| 399 | 6177665 | PBW343*2/KUKUNA//TECUE #1                                                  |
| 400 | 6177666 | PBW343*2/KUKUNA//TECUE #1                                                  |
| 401 | 6177667 | PBW343*2/KUKUNA//TECUE #1                                                  |
| 402 | 6177671 | PBW343*2/KUKUNA//TECUE #1                                                  |
| 403 | 6177674 | JUCHI/HUIRIVIS #1                                                          |
| 404 | 6177675 | JUCHI/HUIRIVIS #1                                                          |
| 405 | 6177721 | HUIRIVIS #1/KBIRD                                                          |
| 406 | 6177732 | PVN//CAR422/ANA/5/BOW/CROW//BUC/PVN/3/YR/4/TRAP#1/6/AKURI #1               |
| 407 | 6177733 | PVN//CAR422/ANA/5/BOW/CROW//BUC/PVN/3/YR/4/TRAP#1/6/AKURI #1               |
| 408 | 6177735 | PVN//CAR422/ANA/5/BOW/CROW//BUC/PVN/3/YR/4/TRAP#1/6/AKURI #1               |
| 409 | 6177737 | FRANCOLIN #1/YANAC                                                         |
| 410 | 6177762 | BL2064//SW89-5124*2/FASAN/3/TILHI/5/KAUZ//ALTAR 84/AOS/3/KAUZ/4/SW94.15464 |
| 411 | 6177765 | BL2064//SW89-5124*2/FASAN/3/TILHI/5/KAUZ//ALTAR 84/AOS/3/KAUZ/4/SW94.15464 |
| 412 | 6177771 | BABAX/LR42//BABAX*2/3/KUKUNA/4/TAM200/PASTOR//TOBA97                       |
| 413 | 6177772 | BABAX/LR42//BABAX*2/3/KUKUNA/4/TAM200/PASTOR//TOBA97                       |
| 414 | 6177773 | BABAX/LR42//BABAX*2/3/KUKUNA/4/TINKIO #1                                   |
| 415 | 6177790 | QUAIU/YANAC                                                                |
| 416 | 6177824 | TAM200/PASTOR//TOBA97/3/WHEAR                                              |
| 417 | 6177828 | FRNCLN/ROLF07                                                              |

---

---

|     |         |                                                                                                 |
|-----|---------|-------------------------------------------------------------------------------------------------|
| 418 | 6177829 | FRNCLN/ROLF07                                                                                   |
| 419 | 6177830 | FRNCLN/ROLF07                                                                                   |
| 420 | 6177834 | FRNCLN/ROLF07                                                                                   |
| 421 | 6177837 | FRNCLN/BECARD                                                                                   |
| 422 | 6177838 | FRNCLN/BECARD                                                                                   |
| 423 | 6177841 | FRNCLN/BECARD                                                                                   |
| 424 | 6177844 | FRNCLN/BECARD                                                                                   |
| 425 | 6177845 | FRNCLN/BECARD                                                                                   |
| 426 | 6177846 | FRNCLN/BECARD                                                                                   |
| 427 | 6177851 | PARUS/FRANCOLIN #1                                                                              |
| 428 | 6177854 | PARUS/FRANCOLIN #1                                                                              |
| 429 | 6177858 | PARUS/FRANCOLIN #1                                                                              |
| 430 | 6177860 | PARUS/FRANCOLIN #1                                                                              |
| 431 | 6177861 | PARUS/FRANCOLIN #1                                                                              |
| 432 | 6177862 | PARUS/FRANCOLIN #1                                                                              |
| 433 | 6177869 | OASIS/SKAUZ//4*BCN/3/PASTOR/4/KAUZ*2/YACO//KAUZ/5/FRET2/TUKURU//FRET2/6/FRET2/TUKURU//FR<br>ET2 |
| 434 | 6177873 | OASIS/SKAUZ//4*BCN/3/PASTOR/4/KAUZ*2/YACO//KAUZ*2/5/KRONSTAD F2004                              |
| 435 | 6177898 | ATTILA*2/PBW65//MUU #1/3/FRANCOLIN #1                                                           |
| 436 | 6177900 | ATTILA*2/PBW65//MUU #1/3/FRANCOLIN #1                                                           |
| 437 | 6177920 | C80.1/3*BATAVIA//2*WBLL1/3/WBLL1*2/TUKURU/4/FRET2/TUKURU//FRET2                                 |
| 438 | 6177929 | SAUAL/3/C80.1/3*BATAVIA//2*WBLL1/4/SITE/MO//PASTOR/3/TILHI                                      |
| 439 | 6177930 | MURGA/3/GAN/AE.SQUARROSA (408)//2*OASIS/5*BORL95/4/FRANCOLIN #1                                 |
| 440 | 6177946 | UP2338*2/VIVITSI/3/FRET2/TUKURU//FRET2/4/MISR 1                                                 |
| 441 | 6177947 | UP2338*2/VIVITSI/3/FRET2/TUKURU//FRET2/4/MISR 1                                                 |
| 442 | 6177950 | UP2338*2/VIVITSI/3/FRET2/TUKURU//FRET2/4/MISR 1                                                 |
| 443 | 6177951 | UP2338*2/VIVITSI/3/FRET2/TUKURU//FRET2/4/MISR 1                                                 |
| 444 | 6177962 | HUIRIVIS #1*2/MURGA                                                                             |
| 445 | 6177968 | HUIRIVIS #1*2/MURGA                                                                             |
| 446 | 6177980 | CONI#1/2*HUIRIVIS #1                                                                            |
| 447 | 6178005 | TECUE #1/2*WAXWING                                                                              |
| 448 | 6178012 | MUU/4/BAV92//IRENA/KAUZ/3/HUITES/5/BAV92//IRENA/KAUZ/3/HUITES                                   |
| 449 | 6178013 | KIRITATI/4/2*BAV92//IRENA/KAUZ/3/HUITES                                                         |
| 450 | 6178017 | KIRITATI/4/2*BAV92//IRENA/KAUZ/3/HUITES                                                         |
| 451 | 6178018 | KIRITATI/4/2*BAV92//IRENA/KAUZ/3/HUITES                                                         |
| 452 | 6178019 | KIRITATI/4/2*BAV92//IRENA/KAUZ/3/HUITES                                                         |
| 453 | 6178020 | KIRITATI/4/2*BAV92//IRENA/KAUZ/3/HUITES                                                         |
| 454 | 6178021 | KIRITATI/4/2*BAV92//IRENA/KAUZ/3/HUITES                                                         |
| 455 | 6178029 | PFAU/WEAVER//KIRITATI/3/FRET2/TUKURU//FRET2/4/FRET2/TUKURU//FRET2                               |
| 456 | 6178040 | MUU/5/WBLL1*2/4/YACO/PBW65/3/KAUZ*2/TRAP//KAUZ/6/WBLL1*2/4/SNI/TRAP#1/3/KAUZ*2/TRAP//KAU<br>Z   |
| 457 | 6178056 | SKAUZ/BAV92//2*WBLL1*2/KKTS                                                                     |
| 458 | 6178080 | KBIRD//WH 542/2*PASTOR/3/WBLL1*2/BRAMBLING                                                      |
| 459 | 6178095 | PVN/5/2*REH/HARE//2*BCN/3/CROC_1/AE.SQUARROSA (213)//PGO/4/HUITES                               |

---

---

|     |         |                                                                    |
|-----|---------|--------------------------------------------------------------------|
| 460 | 6178118 | KZA/5/2*WBLL1/3/STAR//KAUZ/STAR/4/BAV92/RAYON                      |
| 461 | 6178123 | KZA//WH 542/2*PASTOR/3/BACEU #1                                    |
| 462 | 6178134 | KSW/SAUAL//SAUAL                                                   |
| 463 | 6178136 | KSW/SAUAL//SAUAL                                                   |
| 464 | 6178166 | KACHU/6/NG8201/KAUZ/4/SHA7//PRL/VEE#6/3/FASAN/5/MILAN/KAUZ/7/KACHU |
| 465 | 6178176 | KACHU/6/NG8201/KAUZ/4/SHA7//PRL/VEE#6/3/FASAN/5/MILAN/KAUZ/7/KACHU |
| 466 | 6178184 | KACHU/6/NG8201/KAUZ/4/SHA7//PRL/VEE#6/3/FASAN/5/MILAN/KAUZ/7/KACHU |
| 467 | 6178193 | TUKURU//BAV92/RAYON*2/3/JUCHI                                      |
| 468 | 6178199 | TUKURU//BAV92/RAYON*2/3/PVN                                        |
| 469 | 6178200 | TUKURU//BAV92/RAYON*2/3/PVN                                        |
| 470 | 6178201 | TUKURU//BAV92/RAYON*2/3/PVN                                        |
| 471 | 6178205 | TUKURU//BAV92/RAYON*2/3/PVN                                        |
| 472 | 6178206 | TUKURU//BAV92/RAYON*2/3/PVN                                        |
| 473 | 6178225 | PBW343/PASTOR*2//K6295.4A                                          |
| 474 | 6178238 | UP2338*2//KKTS*2//YANAC                                            |
| 475 | 6178240 | UP2338*2//KKTS*2//YANAC                                            |
| 476 | 6178241 | UP2338*2//KKTS*2//YANAC                                            |
| 477 | 6178243 | UP2338*2//KKTS*2//YANAC                                            |
| 478 | 6178244 | UP2338*2//KKTS*2//YANAC                                            |
| 479 | 6178246 | TILILA/JUCHI/4/SERI.1B//KAUZ/HEVO/3/AMAD                           |
| 480 | 6178247 | TILILA/JUCHI/4/SERI.1B//KAUZ/HEVO/3/AMAD                           |
| 481 | 6178248 | TILILA/JUCHI/4/SERI.1B//KAUZ/HEVO/3/AMAD                           |
| 482 | 6178273 | WAXWING*2/DIAMONDBIRD                                              |
| 483 | 6178296 | WAXWING/KIRITATI*2//YANAC                                          |
| 484 | 6178298 | WAXWING/KIRITATI*2//YANAC                                          |
| 485 | 6178331 | BAV92//IRENA/KAUZ/3/HUITES*2/4/DIAMONDBIRD                         |
| 486 | 6178335 | BAV92//IRENA/KAUZ/3/HUITES*2/4/MILAN/KAUZ//CHIL/CHUM18             |
| 487 | 6178362 | BAV92//IRENA/KAUZ/3/HUITES*2/4/PVN                                 |
| 488 | 6178366 | CNO79//PF70354/MUS/3/PASTOR/4/BAV92*2/5/HAR311                     |
| 489 | 6178368 | CNO79//PF70354/MUS/3/PASTOR/4/BAV92*2/5/HAR311                     |
| 490 | 6178369 | CNO79//PF70354/MUS/3/PASTOR/4/BAV92*2/5/HAR311                     |
| 491 | 6178370 | CNO79//PF70354/MUS/3/PASTOR/4/BAV92*2/5/HAR311                     |
| 492 | 6178372 | CNO79//PF70354/MUS/3/PASTOR/4/BAV92*2/5/HAR311                     |
| 493 | 6178376 | CNO79//PF70354/MUS/3/PASTOR/4/BAV92*2/5/HAR311                     |
| 494 | 6178378 | CNO79//PF70354/MUS/3/PASTOR/4/BAV92*2/5/HAR311                     |
| 495 | 6178379 | CNO79//PF70354/MUS/3/PASTOR/4/BAV92*2/5/HAR311                     |
| 496 | 6178383 | CNO79//PF70354/MUS/3/PASTOR/4/BAV92*2/5/HAR311                     |
| 497 | 6178386 | CNO79//PF70354/MUS/3/PASTOR/4/BAV92*2/5/HAR311                     |
| 498 | 6178391 | CNO79//PF70354/MUS/3/PASTOR/4/BAV92*2/5/HAR311                     |
| 499 | 6178393 | CNO79//PF70354/MUS/3/PASTOR/4/BAV92*2/5/HAR311                     |
| 500 | 6178394 | CNO79//PF70354/MUS/3/PASTOR/4/BAV92*2/5/HAR311                     |
| 501 | 6178397 | CNO79//PF70354/MUS/3/PASTOR/4/BAV92*2/5/FH6-1-7                    |
| 502 | 6178398 | CNO79//PF70354/MUS/3/PASTOR/4/BAV92*2/5/FH6-1-7                    |

---

---

|     |         |                                                                                                             |
|-----|---------|-------------------------------------------------------------------------------------------------------------|
| 503 | 6178401 | CNO79//PF70354/MUS/3/PASTOR/4/BAV92*2/5/FH6-1-7                                                             |
| 504 | 6178402 | CNO79//PF70354/MUS/3/PASTOR/4/BAV92*2/5/FH6-1-7                                                             |
| 505 | 6178403 | CNO79//PF70354/MUS/3/PASTOR/4/BAV92*2/5/FH6-1-7                                                             |
| 506 | 6178404 | CNO79//PF70354/MUS/3/PASTOR/4/BAV92*2/5/FH6-1-7                                                             |
| 507 | 6178405 | CNO79//PF70354/MUS/3/PASTOR/4/BAV92*2/5/FH6-1-7                                                             |
| 508 | 6178406 | CNO79//PF70354/MUS/3/PASTOR/4/BAV92*2/5/FH6-1-7                                                             |
| 509 | 6178423 | ROLF07*2/YANAC                                                                                              |
| 510 | 6178424 | ROLF07*2/YANAC                                                                                              |
| 511 | 6178426 | ROLF07*2/DIAMONDBIRD                                                                                        |
| 512 | 6178429 | ROLF07*2/DIAMONDBIRD                                                                                        |
| 513 | 6178431 | ROLF07*2/DIAMONDBIRD                                                                                        |
| 514 | 6178459 | WBLL1/KUKUNA//TACUPETO F2001*2/3/HAR311                                                                     |
| 515 | 6178476 | WBLL1/DIAMONDBIRD//WBLL1*2/VIVITSI                                                                          |
| 516 | 6178477 | WBLL1/DIAMONDBIRD//WBLL1*2/VIVITSI                                                                          |
| 517 | 6178484 | WBLL1*2/VIVITSI*2/6/PVN//CAR422/ANA/5/BOW/CROW//BUC/PVN/3/YR/4/TRAP#1                                       |
| 518 | 6178485 | WBLL1*2/VIVITSI*2/6/PVN//CAR422/ANA/5/BOW/CROW//BUC/PVN/3/YR/4/TRAP#1                                       |
| 519 | 6178517 | KACHU/KIRITATI//KACHU                                                                                       |
| 520 | 6178526 | SAUAL/YANAC//SAUAL                                                                                          |
| 521 | 6178527 | SAUAL/YANAC//SAUAL                                                                                          |
| 522 | 6178528 | SAUAL/YANAC//SAUAL                                                                                          |
| 523 | 6178529 | SAUAL/YANAC//SAUAL                                                                                          |
| 524 | 6178530 | SAUAL/YANAC//SAUAL                                                                                          |
| 525 | 6178531 | SAUAL/YANAC//SAUAL                                                                                          |
| 526 | 6178533 | SAUAL/YANAC//SAUAL                                                                                          |
| 527 | 6178534 | SAUAL/YANAC//SAUAL                                                                                          |
| 528 | 6178537 | SAUAL/KIRITATI//SAUAL                                                                                       |
| 529 | 6178538 | SAUAL/KIRITATI//SAUAL                                                                                       |
| 530 | 6178539 | SAUAL/KIRITATI//SAUAL                                                                                       |
| 531 | 6178541 | SAUAL/KIRITATI//SAUAL                                                                                       |
| 532 | 6178556 | PRL/2*PASTOR*2//FH6-1-7                                                                                     |
| 533 | 6178557 | PRL/2*PASTOR*2//FH6-1-7                                                                                     |
| 534 | 6178564 | PRL/2*PASTOR*2//K6295.4A                                                                                    |
| 535 | 6178575 | CS/TH.SC//3*PVN/3/MIRLO/BUC/4/URES/JUN//KAUZ/5/HUITES/6/YANAC/7/CS/TH.SC//3*PVN/3/MIRLO/BUC/4/MILAN/5/TILHI |
| 536 | 6178591 | FINSI/METSO//FH6-1-7/3/FINSI/METSO                                                                          |
| 537 | 6178600 | FINSI/METSO//FH6-1-7/3/FINSI/METSO                                                                          |
| 538 | 6178633 | PF74354/LD/ALD/4/2*BR12*2/3/JUP//PAR214*6/FB6631/5/NL750/6/PVN/7/TOBA97/PASTOR                              |
| 539 | 6178654 | PBW343*2/KHVAKI*2/6/PVN//CAR422/ANA/5/BOW/CROW//BUC/PVN/3/YR/4/TRAP#1                                       |
| 540 | 6178681 | C80.1/3*BATAVIA//2*WBLL1/4/CROC_1/AE.SUARROSA (224)//KULIN/3/WESTONIA/5/WBLL1*2/KURUKU                      |
| 541 | 6178701 | C80.1/3*BATAVIA//2*WBLL1*2/3/WBLL1*2/TUKURU                                                                 |
| 542 | 6178714 | WAXWING/KIRITATI*2/3/C80.1/3*BATAVIA//2*WBLL1                                                               |
| 543 | 6178715 | WAXWING/KIRITATI*2/3/C80.1/3*BATAVIA//2*WBLL1                                                               |
| 544 | 6178716 | WAXWING/KIRITATI*2/3/C80.1/3*BATAVIA//2*WBLL1                                                               |

---

---

|     |         |                                                                               |
|-----|---------|-------------------------------------------------------------------------------|
| 545 | 6178717 | WAXWING/KIRITATI*2/3/C80.1/3*BATAVIA//2*WBLL1                                 |
| 546 | 6178726 | BAV92//IRENA/KAUZ/3/HUITES*2/4/WHEAR                                          |
| 547 | 6178728 | BAV92//IRENA/KAUZ/3/HUITES*2/4/WHEAR                                          |
| 548 | 6178734 | BAV92//IRENA/KAUZ/3/HUITES*2/4/WHEAR                                          |
| 549 | 6178737 | BAV92//IRENA/KAUZ/3/HUITES*2/4/WHEAR                                          |
| 550 | 6178739 | BAV92//IRENA/KAUZ/3/HUITES*2/4/WHEAR                                          |
| 551 | 6178752 | FRET2/KIRITATI/3/C80.1/3*BATAVIA//2*WBLL1/4/FRET2/TUKURU//FRET2               |
| 552 | 6178759 | KACHU*2/WHEAR                                                                 |
| 553 | 6178760 | KACHU*2/WHEAR                                                                 |
| 554 | 6178763 | KACHU*2/WHEAR                                                                 |
| 555 | 6178768 | KACHU/3/C80.1/3*BATAVIA//2*WBLL1/4/KACHU                                      |
| 556 | 6178770 | KACHU/3/C80.1/3*BATAVIA//2*WBLL1/4/KACHU                                      |
| 557 | 6178775 | KACHU/3/C80.1/3*BATAVIA//2*WBLL1/4/KACHU                                      |
| 558 | 6178783 | SAUAL/WHEAR//SAUAL                                                            |
| 559 | 6178788 | SAUAL/WHEAR//SAUAL                                                            |
| 560 | 6178789 | SAUAL/WHEAR//SAUAL                                                            |
| 561 | 6178790 | SAUAL/WHEAR//SAUAL                                                            |
| 562 | 6178797 | SAUAL/3/C80.1/3*BATAVIA//2*WBLL1/4/SAUAL                                      |
| 563 | 6178819 | SAUAL/3/SW89.3064//CMH82.17/SERI/4/SAUAL                                      |
| 564 | 6178820 | SAUAL/3/SW89.3064//CMH82.17/SERI/4/SAUAL                                      |
| 565 | 6178822 | SAUAL/3/SW89.3064//CMH82.17/SERI/4/SAUAL                                      |
| 566 | 6178824 | SAUAL/3/SW89.3064//CMH82.17/SERI/4/SAUAL                                      |
| 567 | 6178828 | SAUAL*2/3/WL6718//2*PRL/VEE#6                                                 |
| 568 | 6178833 | SAUAL*2/3/WL6718//2*PRL/VEE#6                                                 |
| 569 | 6178834 | SAUAL*2/3/WL6718//2*PRL/VEE#6                                                 |
| 570 | 6178836 | SAUAL*2/3/WL6718//2*PRL/VEE#6                                                 |
| 571 | 6178837 | SAUAL*2/3/WL6718//2*PRL/VEE#6                                                 |
| 572 | 6178838 | SAUAL*2/3/WL6718//2*PRL/VEE#6                                                 |
| 573 | 6178841 | SAUAL*2/3/WL6718//2*PRL/VEE#6                                                 |
| 574 | 6178846 | SAUAL*2/3/WL6718//2*PRL/VEE#6                                                 |
| 575 | 6178847 | SAUAL*2/3/WL6718//2*PRL/VEE#6                                                 |
| 576 | 6178875 | ROLF07*2/5/FCT/3/GOV/AZ//MUS/4/DOVE/BUC                                       |
| 577 | 6178881 | WBLL1/4/BOW/NKT//CBRD/3/CBRD/5/WBLL1*2/TUKURU                                 |
| 578 | 6178888 | WBLL1/4/BOW/NKT//CBRD/3/CBRD/5/WBLL1*2/TUKURU                                 |
| 579 | 6178896 | KACHU*2//CHIL/CHUM18                                                          |
| 580 | 6178897 | KACHU*2//CHIL/CHUM18                                                          |
| 581 | 6178898 | KACHU*2//CHIL/CHUM18                                                          |
| 582 | 6178900 | KACHU*2//CHIL/CHUM18                                                          |
| 583 | 6178901 | KACHU*2//CHIL/CHUM18                                                          |
| 584 | 6178902 | KACHU*2//CHIL/CHUM18                                                          |
| 585 | 6178907 | SAUAL/3/SHA3/SERI//SHA4/LIRA/4/SAUAL                                          |
| 586 | 6178908 | SAUAL/3/SHA3/SERI//SHA4/LIRA/4/SAUAL                                          |
| 587 | 6178918 | PBW343/PASTOR*2/6/TURACO/5/CHIR3/4/SIREN//ALTAR 84/AE.SQUARROSA (205)/3/3*BUC |

---

---

|     |         |                                                                                                  |
|-----|---------|--------------------------------------------------------------------------------------------------|
| 588 | 6178935 | WBLL1*2/TUKURU//FN/2*PASTOR/3/FRET2/KIRITATI                                                     |
| 589 | 6178943 | WAXWING/SRTU//WAXWING/KIRITATI                                                                   |
| 590 | 6178949 | ATTILA*2/PBW65*2//TNMU                                                                           |
| 591 | 6178950 | ATTILA*2/PBW65*2//TNMU                                                                           |
| 592 | 6178964 | FRET2*2/4/SNI/TRAP#1/3/KAUZ*2/TRAP//KAUZ*2/5/BOW/URES//2*WEAVER/3/CROC_1/AE.SQUARROSA (213)//PGO |
| 593 | 6178965 | FRET2*2/4/SNI/TRAP#1/3/KAUZ*2/TRAP//KAUZ*2/5/BOW/URES//2*WEAVER/3/CROC_1/AE.SQUARROSA (213)//PGO |
| 594 | 6178971 | SAAR/2*WAXWING                                                                                   |
| 595 | 6178972 | PFAU/SERI.1B//AMAD/3/WAXWING/4/BABAX/LR42//BABAX*2/3/KURUKU                                      |
| 596 | 6178973 | PFAU/SERI.1B//AMAD/3/WAXWING/4/BABAX/LR42//BABAX*2/3/KURUKU                                      |
| 597 | 6178974 | PFAU/SERI.1B//AMAD/3/WAXWING/4/BABAX/LR42//BABAX*2/3/KURUKU                                      |
| 598 | 6178981 | PFAU/SERI.1B//AMAD/3/WAXWING/4/BABAX/LR42//BABAX*2/3/KURUKU                                      |
| 599 | 6178996 | QUAIU/5/FRET2*2/4/SNI/TRAP#1/3/KAUZ*2/TRAP//KAUZ                                                 |
| 600 | 6178997 | QUAIU/5/FRET2*2/4/SNI/TRAP#1/3/KAUZ*2/TRAP//KAUZ                                                 |
| 601 | 6178999 | QUAIU/5/FRET2*2/4/SNI/TRAP#1/3/KAUZ*2/TRAP//KAUZ                                                 |
| 602 | 6179000 | QUAIU/5/FRET2*2/4/SNI/TRAP#1/3/KAUZ*2/TRAP//KAUZ                                                 |
| 603 | 6179010 | BABAX/LR42//BABAX*2/4/SNI/TRAP#1/3/KAUZ*2/TRAP//KAUZ/5/WBLL1*2/TUKURU                            |
| 604 | 6179012 | WBLL1*2/BRAMBLING/4/BABAX/LR42//BABAX*2/3/KURUKU                                                 |
| 605 | 6179013 | WBLL1*2/BRAMBLING/4/BABAX/LR42//BABAX*2/3/KURUKU                                                 |
| 606 | 6179017 | PFAU/WEAVER*2//BRAMBLING/3/QUAIU                                                                 |
| 607 | 6179044 | QUAIU/TECUE #1                                                                                   |
| 608 | 6179047 | QUAIU/TECUE #1                                                                                   |
| 609 | 6179064 | WBLL1*2/CHAPIO//HAWFINCH #1                                                                      |
| 610 | 6179077 | WBLL1*2/KUKUNA//AKURI #1                                                                         |
| 611 | 6179078 | WBLL1*2/TUKURU//CROSBILL #1                                                                      |
| 612 | 6179079 | WBLL1*2/TUKURU//CROSBILL #1                                                                      |
| 613 | 6179082 | WBLL1*2/TUKURU//CROSBILL #1                                                                      |
| 614 | 6179087 | REH/HARE//2*BCN/3/CROC_1/AE.SQUARROSA (213)//PGO/4/HUITES/5/PVN                                  |
| 615 | 6179088 | REH/HARE//2*BCN/3/CROC_1/AE.SQUARROSA (213)//PGO/4/HUITES/5/PVN                                  |
| 616 | 6179095 | PFAU/WEAVER*2//BRAMBLING/3/AKURI #1                                                              |
| 617 | 6179116 | PBW343*2/KHVAKI/5/KAUZ//ALTAR 84/AOS/3/KAUZ/4/SW94.15464                                         |
| 618 | 6179118 | PAURAQ/4/PFAU/SERI.1B//AMAD/3/WAXWING                                                            |
| 619 | 6179122 | C80.1/3*BATAVIA//2*WBLL1/3/2*FRET2/TUKURU//FRET2                                                 |
| 620 | 6179125 | C80.1/3*BATAVIA//2*WBLL1/3/2*FRET2/TUKURU//FRET2                                                 |
| 621 | 6179128 | TACUPETO F2001/SAUAL/4/BABAX/LR42//BABAX*2/3/KURUKU                                              |
| 622 | 6179129 | TACUPETO F2001/SAUAL/4/BABAX/LR42//BABAX*2/3/KURUKU                                              |
| 623 | 6179130 | TACUPETO F2001/SAUAL/4/BABAX/LR42//BABAX*2/3/KURUKU                                              |
| 624 | 6179132 | TACUPETO F2001/SAUAL/4/BABAX/LR42//BABAX*2/3/KURUKU                                              |
| 625 | 6179136 | TACUPETO F2001/SAUAL/4/BABAX/LR42//BABAX*2/3/KURUKU                                              |
| 626 | 6179141 | CHEN/AE.SQ//WEAVER/3/SSERI/4/TOBA97/PASTOR/5/MUU #1                                              |
| 627 | 6179143 | CHEN/AE.SQ//WEAVER/3/SSERI/4/TOBA97/PASTOR/5/MUU #1                                              |
| 628 | 6179148 | MUU #1/SAUAL//MUU                                                                                |
| 629 | 6179151 | MUU #1//PBW343*2/KUKUNA/3/MUU                                                                    |

---

---

|     |         |                                                                                                |
|-----|---------|------------------------------------------------------------------------------------------------|
| 630 | 6179152 | MUU #1//PBW343*2/KUKUNA/3/MUU                                                                  |
| 631 | 6179156 | MUU #1//PBW343*2/KUKUNA/3/MUU                                                                  |
| 632 | 6179159 | MUU #1//PBW343*2/KUKUNA/3/MUU                                                                  |
| 633 | 6179165 | BABAX/LR42//BABAX/3/BABAX/LR42//BABAX/4/ATTILA/2*PASTOR/5/QUAIU #3                             |
| 634 | 6179184 | OASIS/SKAUZ//4*BCN/3/2*PASTOR/5/FRET2*2/4/SNI/TRAP#1/3/KAUZ*2/TRAP//KAUZ/6/SAUAL               |
| 635 | 6179185 | OASIS/SKAUZ//4*BCN/3/2*PASTOR/5/FRET2*2/4/SNI/TRAP#1/3/KAUZ*2/TRAP//KAUZ/6/SAUAL               |
| 636 | 6179207 | KFA/2*KACHU                                                                                    |
| 637 | 6179216 | KFA/2*KACHU                                                                                    |
| 638 | 6179218 | KFA/2*KACHU                                                                                    |
| 639 | 6179220 | KFA/2*KACHU                                                                                    |
| 640 | 6179221 | KFA/2*KACHU                                                                                    |
| 641 | 6179222 | PBW343*2/KUKUNA*2//FRTL/PIFED                                                                  |
| 642 | 6179223 | PBW343*2/KUKUNA*2//FRTL/PIFED                                                                  |
| 643 | 6179225 | PBW343*2/KUKUNA*2//FRTL/PIFED                                                                  |
| 644 | 6179226 | PBW343*2/KUKUNA*2//FRTL/PIFED                                                                  |
| 645 | 6179227 | PBW343*2/KUKUNA*2//FRTL/PIFED                                                                  |
| 646 | 6179228 | PBW343*2/KUKUNA*2//FRTL/PIFED                                                                  |
| 647 | 6179236 | INQALAB 91*2/KUKUNA*2//PVN                                                                     |
| 648 | 6179244 | INQALAB 91*2/KUKUNA*2//PVN                                                                     |
| 649 | 6179247 | KANCHAN*2/JUCHI                                                                                |
| 650 | 6179249 | KANCHAN*2/JUCHI                                                                                |
| 651 | 6179251 | TILILA/TUKURU/4/SERI.1B*2/3/KAUZ*2/BOW//KAUZ                                                   |
| 652 | 6179253 | WBLL1*2/4/BABAX/LR42//BABAX/3/BABAX/LR42//BABAX                                                |
| 653 | 6179254 | WBLL1*2/4/BABAX/LR42//BABAX/3/BABAX/LR42//BABAX                                                |
| 654 | 6179255 | WBLL1*2/4/BABAX/LR42//BABAX/3/BABAX/LR42//BABAX                                                |
| 655 | 6179261 | BABAX/LR42//BABAX/3/BABAX/LR42//BABAX/4/DIAMONDBIRD/5/FRET2/TUKURU//FRET2                      |
| 656 | 6179271 | TACUPETO F2001/6/CNDO/R143//ENTE/MEXI_2/3/AEGILOPS SQUARROSA (TAUS)/4/WEAVER/5/PASTOR/7/ROLF07 |
| 657 | 6179272 | TACUPETO F2001/6/CNDO/R143//ENTE/MEXI_2/3/AEGILOPS SQUARROSA (TAUS)/4/WEAVER/5/PASTOR/7/ROLF07 |
| 658 | 6179273 | TACUPETO F2001/6/CNDO/R143//ENTE/MEXI_2/3/AEGILOPS SQUARROSA (TAUS)/4/WEAVER/5/PASTOR/7/ROLF07 |
| 659 | 6179274 | TACUPETO F2001/6/CNDO/R143//ENTE/MEXI_2/3/AEGILOPS SQUARROSA (TAUS)/4/WEAVER/5/PASTOR/7/ROLF07 |
| 660 | 6179275 | TACUPETO F2001/6/CNDO/R143//ENTE/MEXI_2/3/AEGILOPS SQUARROSA (TAUS)/4/WEAVER/5/PASTOR/7/ROLF07 |
| 661 | 6179276 | TACUPETO F2001/6/CNDO/R143//ENTE/MEXI_2/3/AEGILOPS SQUARROSA (TAUS)/4/WEAVER/5/PASTOR/7/ROLF07 |
| 662 | 6179277 | TACUPETO F2001/6/CNDO/R143//ENTE/MEXI_2/3/AEGILOPS SQUARROSA (TAUS)/4/WEAVER/5/PASTOR/7/ROLF07 |
| 663 | 6179286 | WBLL1*2/KUKUNA//KIRITATI/3/WBLL1*2/KUKUNA                                                      |
| 664 | 6179291 | WBLL1*2/KUKUNA//KIRITATI/3/WBLL1*2/KUKUNA                                                      |
| 665 | 6179293 | WBLL1*2/KUKUNA//KIRITATI/3/WBLL1*2/KUKUNA                                                      |
| 666 | 6179294 | WBLL1*2/KUKUNA//KIRITATI/3/WBLL1*2/KUKUNA                                                      |
| 667 | 6179296 | WBLL1*2/KUKUNA//KIRITATI/3/WBLL1*2/KUKUNA                                                      |
| 668 | 6179298 | WBLL1*2/KUKUNA//KIRITATI/3/WBLL1*2/KUKUNA                                                      |
| 669 | 6179318 | KAUZ/PASTOR//PBW343/3/HAR311/5/OASIS/SKAUZ//4*BCN/3/PASTOR/4/KAUZ*2/YACO//KAUZ                 |
| 670 | 6179322 | KAUZ/PASTOR//PBW343/3/HAR311/5/OASIS/SKAUZ//4*BCN/3/PASTOR/4/KAUZ*2/YACO//KAUZ                 |

---

---

|     |         |                                                                                                                      |
|-----|---------|----------------------------------------------------------------------------------------------------------------------|
| 671 | 6179325 | C80.1/3*BATAVIA//2*WBLL1*2/3/PBW343/PASTOR                                                                           |
| 672 | 6179332 | WBLL1/KUKUNA/TACUPETO F2001*2/3/C80.1/3*BATAVIA//2*WBLL1                                                             |
| 673 | 6179344 | FRANCOLIN #1/4/BABAX/LR42//BABAX*2/3/KURUKU                                                                          |
| 674 | 6179345 | FRANCOLIN #1/4/BABAX/LR42//BABAX*2/3/KURUKU                                                                          |
| 675 | 6179346 | FRANCOLIN #1/4/BABAX/LR42//BABAX*2/3/KURUKU                                                                          |
| 676 | 6179347 | FRANCOLIN #1/4/BABAX/LR42//BABAX*2/3/KURUKU                                                                          |
| 677 | 6179348 | FRANCOLIN #1/4/BABAX/LR42//BABAX*2/3/KURUKU                                                                          |
| 678 | 6179353 | PANDORA/4/BABAX/LR42//BABAX*2/3/KURUKU                                                                               |
| 679 | 6179362 | KSW/5/2*ALTAR 84/AE.SQUARROSA (221)//3*BORL95/3/URES/JUN//KAUZ/4/WBLL1                                               |
| 680 | 6179370 | KSW/5/2*ALTAR 84/AE.SQUARROSA (221)//3*BORL95/3/URES/JUN//KAUZ/4/WBLL1                                               |
| 681 | 6179386 | OTUS/TOBA97//YANAC/3/TOBA97/ATILA                                                                                    |
| 682 | 6179403 | WBLL1*2/4/BABAX/LR42//BABAX/3/BABAX/LR42//BABAX                                                                      |
| 683 | 6179417 | CHIL/CHUM18//GONDO                                                                                                   |
| 684 | 6179423 | KACHU/3/SHA3/SERI//SHA4/LIRA/4/KACHU                                                                                 |
| 685 | 6179457 | TACUPETO F2001//WBLL1*2/KKTS/3/WBLL1*2/BRAMBLING                                                                     |
| 686 | 6179463 | WBLL1*2/KURUKU//KRONSTAD F2004/3/WBLL1*2/BRAMBLING                                                                   |
| 687 | 6179464 | WBLL1*2/KURUKU//KRONSTAD F2004/3/WBLL1*2/BRAMBLING                                                                   |
| 688 | 6179465 | WBLL1*2/TUKURU*2//KRONSTAD F2004                                                                                     |
| 689 | 6179466 | WBLL1*2/TUKURU*2//KRONSTAD F2004                                                                                     |
| 690 | 6179469 | WBLL1*2/VIVITSI//KRONSTAD F2004/3/WBLL1*2/BRAMBLING                                                                  |
| 691 | 6179470 | WBLL1/4/HD2281/TRAP#1/3/KAUZ*2/TRAP//KAUZ/5/TACUPETO<br>F2001/6/WBLL1*2/KKTS/7/WBLL1*2/BRAMBLING                     |
| 692 | 6179471 | WBLL1/KUKUNA/TACUPETO F2001/3/KRONSTAD F2004/4/ROLF07                                                                |
| 693 | 6179473 | WBLL1/KUKUNA/TACUPETO F2001/3/KRONSTAD F2004/4/ROLF07                                                                |
| 694 | 6179474 | WBLL1/KUKUNA/TACUPETO F2001/3/KRONSTAD F2004/4/ROLF07                                                                |
| 695 | 6179475 | PRL/2*PASTOR*2//VORB                                                                                                 |
| 696 | 6179479 | ATILA*2/PBW65//KRONSTAD F2004                                                                                        |
| 697 | 6179481 | KAUZ/PASTOR//PBW343/3/KRONSTAD F2004                                                                                 |
| 698 | 6179497 | WBLL1*2/TUKURU//KRONSTAD F2004                                                                                       |
| 699 | 6179508 | YAV_3/SCO//JO69/CRA/3/YAV79/4/AE.SQUARROSA (498)/5/LINE<br>1073/6/KAUZ*2/4/CAR//KAL/BB/3/NAC/5/KAUZ/7/KRONSTAD F2004 |
| 700 | 6179510 | PRL/2*PASTOR//VORB                                                                                                   |
| 701 | 6179526 | BAV92//IRENA/KAUZ/3/HUITES*2/6/TURACO/5/CHIR3/4/SIREN//ALTAR 84/AE.SQUARROSA (205)/3/3*BUC                           |
| 702 | 6179527 | BAV92//IRENA/KAUZ/3/HUITES*2/6/TURACO/5/CHIR3/4/SIREN//ALTAR 84/AE.SQUARROSA (205)/3/3*BUC                           |
| 703 | 6179534 | TRCH*2/3/WUH1/VEE#5//CBRD                                                                                            |
| 704 | 6179538 | WBLL1*2/4/YACO/PBW65/3/KAUZ*2/TRAP//KAUZ*2/5/CHUANMAI 32                                                             |
| 705 | 6179542 | WBLL1*2/KURUKU/4/BABAX/LR42//BABAX*2/3/KURUKU                                                                        |
| 706 | 6179543 | WBLL1*2/KURUKU/4/BABAX/LR42//BABAX*2/3/KURUKU                                                                        |
| 707 | 6179553 | MURGA/KRONSTAD F2004//QUAIU #3                                                                                       |
| 708 | 6179559 | KFA/3/PFAU/WEAVER//BRAMBLING/4/PFAU/WEAVER*2//BRAMBLING                                                              |
| 709 | 6179562 | PBW343*2/KHVAKI*2//YANAC                                                                                             |
| 710 | 6179596 | BECARD/KACHU                                                                                                         |
| 711 | 6179621 | FRET2/TUKURU//FRET2/3/KRONSTAD F2004/4/FRET2/TUKURU//FRET2                                                           |
| 712 | 6179640 | MUNAL #1                                                                                                             |

---



---

|     |         |                                                                              |
|-----|---------|------------------------------------------------------------------------------|
| 713 | 6181746 | WBLL1*2/BRAMBLING//JUCHI                                                     |
| 714 | 6181747 | BABAX/LR42//BABAX/3/BABAX/LR42//BABAX/4/ATTILA/2*PASTOR/5/QUAIU #3           |
| 715 | 6181748 | BABAX/LR42//BABAX/3/BABAX/LR42//BABAX/4/ATTILA/2*PASTOR/5/QUAIU #3           |
| 716 | 6181749 | BABAX/LR42//BABAX/3/BABAX/LR42//BABAX/4/ATTILA/2*PASTOR/5/QUAIU #3           |
| 717 | 6181750 | KENYA NYANGUMI/3/2*KAUZ/PASTOR//PBW343                                       |
| 718 | 6181755 | TILILA/JUCHI/4/SERI.1B//KAUZ/HEVO/3/AMAD                                     |
| 719 | 6181759 | HEILO/7/IVAN/6/SABUF/5/BCN/4/RABI//GS/CRA/3/AE.SQUARROSA (190)/8/VORB/FISCAL |
| 720 | 6181760 | MUNAL #1                                                                     |

---

Supplementary Table S2 Trait adjusted means under three irrigation treatments (Bed 5IR, Flat 5IR and Bed ZT 5IR), two drought stress treatments (Bed drip and Bed 2IR) and one heat stress (Bed heat) treatment and their heritabilities across environments

| Trait | Environments         |      |       |                      |      |       |                        |      |       |                      |      |       |                     |      |       |                      |      |       | $h^2$ (combined environments) |
|-------|----------------------|------|-------|----------------------|------|-------|------------------------|------|-------|----------------------|------|-------|---------------------|------|-------|----------------------|------|-------|-------------------------------|
|       | Bed 5 IR (2009-2010) |      |       | Flat 5IR (2010-2011) |      |       | Bed ZT 5IR (2010-2011) |      |       | Bed drip (2010-2011) |      |       | Bed 2IR (2010-2011) |      |       | Bed Heat (2010-2011) |      |       |                               |
|       | Min                  | Max  | Mean  | Min                  | Max  | Mean  | Min                    | Max  | Mean  | Min                  | Max  | Mean  | Min                 | Max  | Mean  | Min                  | Max  | Mean  |                               |
| GY    | 5.87                 | 9.19 | 7.70  | 4.82                 | 9.22 | 7.64  | 4.53                   | 8.34 | 6.62  | 0.01                 | 2.91 | 1.26  | 1.51                | 5.15 | 3.59  | 1.90                 | 5.15 | 3.73  | 0.54                          |
| DH    | 73                   | 102  | 88.55 | 74                   | 107  | 91.78 | 80                     | 111  | 95.16 | 72                   | 99   | 86.54 | 77                  | 100  | 91.11 | 54                   | 71   | 62.39 | 0.94                          |
| PH    | 87                   | 120  | 104.8 | 95                   | 127  | 113.0 | 77                     | 121  | 99.82 | -                    | -    | -     | 56                  | 98   | 77.65 | 55                   | 95   | 76.40 | 0.76                          |

GY Grain yield in tons per hectare

DH Days to heading

PH Plant height

Supplementary Table S3 Descriptive statistics of susceptibility indices and yield stability coefficient  $P_i$

| Index            | Min  | Max  | Average |
|------------------|------|------|---------|
| DSI              | 0.70 | 1.23 | 1.00    |
| HSI              | 0.51 | 1.66 | 1.02    |
| Yld St ( $P_i$ ) | 0.34 | 3.55 | 1.42    |

DSI Drought susceptibility index

HSI Heat susceptibility index

$P_i$  Superiority index

Supplementary Table S4 Pearson correlation coefficient (r) of grain yield (GY) with days to heading (DH) and plant height (PH) under multiple environments

| Traits    | Bed 5IR<br>(2009-2010) | Bed ZT 5IR<br>(2010-2011) | Flat 5IR<br>(2010-2011) | Bed drip<br>(2010-2011) | Bed 2IR<br>(2010-2011) | Bed heat<br>(2010-2011) |
|-----------|------------------------|---------------------------|-------------------------|-------------------------|------------------------|-------------------------|
| GY and DH | 0.358<br>P<0.0001      | 0.158<br>P<0.05           | -0.347<br>P<0.0001      | -0.641<br>P<0.0001      | -0.568<br>P<0.0001     | -0.091<br>P<0.01        |
| GY and PH | 0.243<br>P<0.001       | 0.502<br>P<0.001          | 0.035<br>NS             | -                       | 0.549<br>P<0.01        | 0.514<br>P<0.01         |

NS non-significant at P<0.05

Supplementary Table S5 Correlation between traits and population structure from multiple regression analysis

| Traits | Environments |           |          |          |         |          |
|--------|--------------|-----------|----------|----------|---------|----------|
|        | Bed 5IR      | BedZT 5IR | Flat 5IR | Bed drip | Bed 2IR | Bed heat |
| DH     | 4.9*         | 5.0       | 6.6      | 7.0      | 5.9     | 4.1      |
|        | 0.007**      | 0.001     | 0.05     | 0.008    | 0.001   | 0.009    |
| GY     | 7.0          | 7.5       | 6.1      | 9.2      | 7.6     | 6.3      |
|        | 0.001        | 0.005     | 0.001    | 0.01     | 0.01    | 0.006    |
| PH     | 15.8         | 17.3      | 16.0     | -        | 16.4    | 14.2     |
|        | 0.001        | 0.001     | 0.05     |          | 0.006   | 0.05     |

\*R<sup>2</sup> in %

\*\* *P* value

Supplementary Table S6 Marker-trait associations for grain yield under different environments using MLM and MLMM analyses

| SNP code                   | Clone ID | Chromosome | Position (cM) | Bed 5IR | BedZT 5IR     | Flat 5IR      | Bed drip      | Bed 2IR       | Bed heat      | DSI           | HSI           | Comment*                        |
|----------------------------|----------|------------|---------------|---------|---------------|---------------|---------------|---------------|---------------|---------------|---------------|---------------------------------|
| M3989 <sup>a</sup>         | 1195316  | 1B         | 137.71        |         |               |               |               |               | -0.116        |               | 0.030         | Novel                           |
| M4026 <sup>b</sup>         | 1404300  | 1B         | 202.01        |         |               |               |               |               | -0.112        |               | 0.035         | Novel                           |
| <u>M7629</u> <sup>b</sup>  | 1199138  | 2A         | 18.22         | 0.099   |               | <b>0.139</b>  |               |               |               |               |               | Known <sup>15</sup>             |
| <u>M5994</u> <sup>a</sup>  | 1024649  | 2A         | 19.21         |         |               | <b>0.109</b>  |               |               |               |               |               |                                 |
| M2018 <sup>a</sup>         | 1013903  | 2B         | 140.01        | -0.135  |               |               |               |               |               |               |               | Known <sup>15</sup>             |
| M2386 <sup>b</sup>         | 988728   | 2B         | 22.41         |         |               |               | <b>0.141</b>  |               |               | <b>-0.025</b> |               | Novel                           |
| <u>M1021</u> <sup>b</sup>  | 1121362  | 2B         | 147.53        |         | -0.183        |               |               | <b>-0.146</b> | -0.223        |               |               | Known <sup>17</sup>             |
| <u>M8374</u> <sup>a</sup>  | 2309600  | 2B         | 147.53        |         |               |               |               |               | <b>-0.194</b> |               | <b>0.060</b>  |                                 |
| <u>M5705</u> <sup>a</sup>  | 1386000  | 2B         | 150.25        |         | -0.115        |               | <b>0.148</b>  |               |               | <b>-0.025</b> |               |                                 |
| M3150 <sup>b</sup>         | 996372   | 3A         | 137.76        |         | <b>-0.124</b> | <b>0.172</b>  | <b>-0.141</b> | <b>-0.183</b> | <b>-0.114</b> | 0.023         |               | Known <sup>17, 32, 33</sup>     |
| M7482 <sup>b</sup>         | 2265707  | 3A         | 242.72        |         | 0.089         | <b>0.156</b>  |               | <b>0.129</b>  |               |               |               | Novel                           |
| M4479 <sup>a</sup>         | 1095926  | 3B         | 94.94         | 0.099   |               |               |               |               |               |               |               | Known <sup>13, 34</sup>         |
| <u>M4718</u> <sup>a</sup>  | 1228289  | 3B         | 297.56        |         |               |               | <b>-0.187</b> |               |               |               | <b>0.035</b>  | Known <sup>15, 34</sup>         |
| <u>M7810</u> <sup>a</sup>  | 1098221  | 3B         | 297.56        |         |               |               | 0.101         | <b>0.119</b>  |               | <b>-0.017</b> |               |                                 |
| <u>M4418</u> <sup>b</sup>  | 1003553  | 4A         | 177.34        | 0.086   |               |               | <b>-0.124</b> |               |               | <b>0.025</b>  |               | Known <sup>17</sup>             |
| <u>M9969</u> <sup>a</sup>  | 2266806  | 4A         | 177.34        |         |               |               |               | <b>-0.121</b> |               |               |               |                                 |
| M2195 <sup>b</sup>         | 992502   | 4A         | 233.75        |         | <b>0.129</b>  |               |               | 0.063         | <b>0.069</b>  |               |               | Known <sup>13, 15, 17, 35</sup> |
| <u>M8365</u> <sup>b</sup>  | 1192194  | 4A         | 53.74         |         | <b>0.148</b>  |               |               | 0.138         | <b>0.136</b>  |               |               | Novel                           |
| <u>M6564</u> <sup>b</sup>  | 2255707  | 4A         | 48.95         |         | <b>0.180</b>  |               |               |               | <b>0.199</b>  |               | <b>-0.037</b> |                                 |
| <u>M612</u> <sup>b</sup>   | 977534   | 4A         | 48.95         |         | 0.120         |               |               | <b>0.141</b>  | 0.126         |               |               |                                 |
| <u>M2118</u> <sup>a</sup>  | 1125898  | 5B         | 156.57        | 0.132   |               |               |               |               |               |               |               | Known <sup>13, 15</sup>         |
| <u>M5964</u> <sup>b</sup>  | 1255792  | 5B         | 153.69        |         | <b>-0.101</b> | <b>-0.102</b> |               | <b>-0.108</b> |               |               |               |                                 |
| <i>Vrn-B1</i> <sup>b</sup> |          | 5B         | 165.80        |         |               |               | -0.157        | -0.231        |               | 0.027         |               |                                 |
| <u>M3762</u> <sup>a</sup>  | 1109166  | 5B         | 55.28         |         |               | <b>0.135</b>  |               |               |               |               |               | Known <sup>15</sup>             |
| <u>M3487</u> <sup>a</sup>  | 1001679  | 5B         | 55.28         |         |               |               |               | -0.094        |               |               |               |                                 |
| <u>M306</u> <sup>a</sup>   | 976877   | 5B         | 82.46         |         |               |               | <b>-0.138</b> |               |               | <b>0.024</b>  |               | Novel                           |

Supplementary Table S6 (contd) Marker-trait associations for grain yield under different environments using MLM and MLMM analyses

| SNP code                               | Clone ID | Chromosome | Position (cM) | Bed 5IR      | BedZT 5IR     | Flat 5IR      | Bed drip      | Bed 2IR | Bed heat      | DSI    | HSI           | Comment*                |
|----------------------------------------|----------|------------|---------------|--------------|---------------|---------------|---------------|---------|---------------|--------|---------------|-------------------------|
| <u>M6272</u> <sup>b</sup>              | 2266544  | 5B         | 82.77         |              | <b>-0.121</b> |               | <b>-0.089</b> |         |               |        |               |                         |
| M4010 <sup>a</sup>                     | 1205840  | 6A         | 188.83        |              |               |               |               |         | -0.179        |        |               | Known <sup>13, 15</sup> |
| M7096 <sup>a</sup>                     | 2256226  | 6A         | 165.94        |              |               |               |               |         | 0.160         |        | -0.052        | Novel                   |
| M4311 <sup>a</sup>                     | 1200675  | 6B         | 5.21          | -0.172       |               |               |               |         |               |        |               | Known <sup>13</sup>     |
| <u>M8490</u> <sup>a</sup>              | 2267049  | 7A         | 170.91        |              | 0.095         |               | 0.074         | 0.068   |               |        |               | Known <sup>13, 15</sup> |
| <u>M4129</u> <sup>a</sup>              | 1194387  | 7A         | 173.30        |              |               |               |               |         | <b>0.135</b>  |        | <b>-0.050</b> | Known <sup>13, 15</sup> |
| M7175 <sup>b</sup>                     | 1092695  | 7B         | 202.20        |              | 0.143         |               | 0.106         |         | 0.150         |        | -0.030        | Novel                   |
| M1441 <sup>b</sup>                     | 989685   | 7B         | 112.24        |              |               | <b>-0.136</b> | -0.076        |         |               |        |               | Novel                   |
| M845 <sup>a</sup>                      | 1072804  | 7B         | 188.81        |              |               |               | -0.101        |         |               | 0.017  |               | Known <sup>15, 38</sup> |
| M7896 <sup>a</sup>                     | 1119182  | 7B         | 242.06        |              |               |               |               |         | <b>-0.192</b> |        | <b>0.044</b>  | Known <sup>15</sup>     |
| M6533 <sup>a</sup>                     | 2242441  | 7D         | 224.31        | <b>0.184</b> |               |               |               |         |               |        |               | Known                   |
| M4711 <sup>a</sup>                     | 1111392  | 7D         | 213.42        | <b>0.181</b> |               |               |               |         |               |        |               | Known                   |
| <i>Ppd-D1</i> Ciano type <sup>b</sup>  |          |            |               |              |               |               | -0.247        |         |               | 0.047  |               |                         |
| <i>Ppd-D1</i> Mercia type <sup>b</sup> |          |            |               |              |               |               | 0.222         |         |               | -0.045 |               |                         |

For each marker, chromosome, position, and allelic effects (All Eff) are presented. Underlined markers represent same genomic region on a chromosome. Values after marker positions represent allelic effects of the markers under different environments. Values in bold represent allelic effects of the markers that survived covariate analysis with DH genes.

<sup>a, b</sup> signs in superscript indicate markers identified only in MLM analysis (superscript a) and in both MLM and MLMM analyses (superscript b)

\* Markers identified here are categorized into novel and known genomic regions. Since the average LD decay across genome was 5cM, the markers were identified within 5cM of known QTL are reported as known and the corresponding reference has been superscripted. For markers belonging to same genomic region/QTL, the comment has been put only on the first marker reported from that genomic region.

Supplementary Table S7 Marker-trait associations identified for grain yield (GY) and Yield Stability Coefficient (Yld St) exclusively in multi-locus mixed-model analysis

| SNP code     | Clone ID | Chr | Pos (cM) | Yld St<br><i>P</i> value<br>(EBIC) | GY        |               |           |           |           |                         |
|--------------|----------|-----|----------|------------------------------------|-----------|---------------|-----------|-----------|-----------|-------------------------|
|              |          |     |          |                                    | Flat 5IR  | Bed ZT<br>5IR | Bed drip  | Bed heat  | DSI       | HSI                     |
| M4782        | 992333   | 1B  | 158.78   |                                    |           |               | 1.583e-07 |           | 1.631e-08 | Novel                   |
| M2337        | 1220556  | 3A  | 203.85   |                                    |           |               | 2.538e-06 |           | 2.538e-06 | Novel                   |
| M3962        | 1035788  | 3B  | 159.02   | 5.400e-06                          |           | 7.714e-05     |           |           |           | Known <sup>13</sup>     |
| M2683        | 1217870  | 3B  | 175.53   |                                    |           | 1.288e-05     |           | 1.461e-04 |           | Novel                   |
| <u>M9699</u> | 2288336  | 7B  | 194.87   | 2.802e-05                          |           | 3.688e-05     |           |           |           | Known <sup>15, 38</sup> |
| <u>M7958</u> | 985691   | 7B  | 195.73   |                                    | 1.456e-04 |               |           |           |           | Known <sup>15, 38</sup> |

Underlined markers belong to same genomic region/QTL



Supplementary Table S8 GBS sequences of markers associated with yield stability coefficient

| Marker ID | SNP ID              | Sequence                                                                 |
|-----------|---------------------|--------------------------------------------------------------------------|
| M1021     | 1121362 F 0--17:G>A | TGCAGTGC AACACACACACGCGGCCACGCATGCAGCAGGCATTGCGACAAAACATCACGCTCGCGGCCTGC |
| M5705     | 1386000 F 0--27:C>G | TGCAGCAGCTCTACTTCTGCTCATCTCCAAAGGAAGAAAGTACTACTTCTGCGCCTCCGCTGCATCAAC    |
| M3150     | 996372 F 0--17:T>C  | TGCAGGTGGCCCCACTTCCACTTCGTATTGGATTCCCTTCTGCACTTTTCACCATTTGTCAGCTATATA    |
| M7482     | 2265707 F 0--17:G>C | TGCAGCAGGCACAACAGGTTGGAACATGGGCGCCAGAGCCGCTCCATCCGTCCCTCGATCGGTCACACTT   |
| M7810     | 1098221 F 0--6:A>G  | TGCAGCAGAAGCAGAGTAGGAGGATGGCGGCGGGAGTGGTGCGCCGCCGCCTCGCCCTCGCCGAGATCG    |
| M6564     | 2255707 F 0--67:G>A | TGCAGCTATTTGTGCATGCTTCGTCGTCGTCGACGGTGTGAAGGCATTTTTCGACGGCTACCCCGAAGC    |
| M612      | 977534 F 0--37:G>C  | TGCAGCGATAAGTAGTAGTAGTACTTAGTGTTGTAATGACACTTAACTATCAACAGTAACCGAGATCGG    |
| M8365     | 1192194 F 0--49:A>G | TGCAGCAGAACTCGCTAATACTACGTTACAAAAAAAAAACTCTTATGAACAGGCAAACTGTAGACCCCC    |
| M2195     | 992502 F 0--6:C>A   | TGCAGACTTGCCGCCATGACCTTTCTATCTACTGATTTGATTGGATGTCATGCTCGGCGGGATCCCTCG    |
| M5964     | 1255792 F 0--52:C>G | TGCAGCTCGGCCAGACGCCGCTGGTGGTGGTGTGTCCTCAAGGAGACGGCGCGCCTGGTGCTCAAGACCC   |
| M6272     | 2266544 F 0--57:G>C | TGCAGCCGAGAAAGCCAGGGTCACATCAAAGTTTGTGTAACGTACTCAGGAAATCCAAGTACTCGAGCT    |
| M306      | 976877 F 0--25:G>A  | TGCAGTGATGAATAAACAGAGAGGCCGATTTTGGATCCCTTATGATTTGCTCGTACTTTGCTAATCTCTC   |
| M8490     | 2267049 F 0--35:T>C | TGCAGTACAAATCTCCTCCACTTCGTGATAACATGTGTTAAAAACAAGAAAGATCCGTCGAGCAGGCAG    |
| M7175     | 1092695 F 0--44:G>C | TGCAGCGGAGCATCCTCGCGCTGAACGGAAAGGCTGCTTAAAACGCTCGTGCAGTCCAGTTGCAGCGAG    |
| M1441     | 989685 F 0--12:A>G  | TGCAGTGTCTCCACGCGACCCACCCCGATGCAGGCCGCGTGAAGGCCGCCGTA CTGGGACGCCAGGGAC   |

Supplementary Table S9 Marker-trait associations for days to heading under different environments using MLM and MLMM analyses

| SNP code                                 | Clone ID | Chromosome | Position (cM) | Bed 5IR | BedZT 5IR | Flat 5IR | Bed drip | Bed 2IR | Bed heat |
|------------------------------------------|----------|------------|---------------|---------|-----------|----------|----------|---------|----------|
| M3150 <sup>b</sup>                       | 996372   | 3A         | 137.76        | 1.74    | 1.99      | 2.10     |          | 1.77    | 1.04     |
| M7482 <sup>a</sup>                       | 2265707  | 3A         | 242.72        |         |           | -1.49    |          |         |          |
| M6882 <sup>a</sup>                       | 2276075  | 3A         | 210.94        |         |           | -1.27    |          |         |          |
| M6946 <sup>a</sup>                       | 1164647  | 3A         | 55.90         |         |           |          | -1.12    | -0.95   |          |
| M9867 <sup>a</sup>                       | 1053955  | 3B         | 94.98         |         |           |          |          | -0.97   |          |
| <u>M9969</u> <sup>b</sup>                | 2266806  | 4A         | 177.34        | 0.91    | 1.42      | 1.16     |          | 1.08    |          |
| <u>M262</u> <sup>a</sup>                 | 1071810  | 4A         | 178.31        |         |           |          |          | 1.21    |          |
| M7022 <sup>a</sup>                       | 1696122  | 4B         | 86.87         |         | -2.16     |          |          |         |          |
| <u>Vrn-B1a</u> <sup>b</sup>              |          | 5B         | 165.80        | 2.19    | 2.20      | 2.26     | 3.59     | 3.19    | 1.37     |
| M6414 <sup>a</sup>                       | 2283173  | 5B         | 66.66         |         |           | -1.81    |          |         |          |
| M306 <sup>b</sup>                        | 976877   | 5B         | 82.46         |         |           |          | 1.19     |         | 0.82     |
| M6460 <sup>b</sup>                       | 2267368  | 5B         | 152.32        |         |           |          |          | -1.23   | -0.81    |
| <u>M2222</u> <sup>a</sup>                | 1093026  | 6A         | 122.86        | 1.02    |           |          |          | 1.05    |          |
| <u>M5183</u> <sup>b</sup>                | 1050270  | 6A         | 122.86        | 1.01    |           |          |          | 1.17    |          |
| M4216 <sup>b</sup>                       | 1082949  | 6A         | 168.41        | -1.17   | -1.62     |          | -1.60    | -1.34   | -0.96    |
| M3870 <sup>a</sup>                       | 997146   | 7B         | 242.25        |         | 1.08      | 1.09     |          | 0.92    |          |
| <i>Ppd-D1a</i> (Ciano type) <sup>b</sup> |          |            |               |         |           |          | 2.79     |         | 1.14     |
| <i>Ppd-D1</i> (Mercia type) <sup>b</sup> |          |            |               |         |           |          | -2.43    |         | -1.26    |
| <i>Ppd-B1a</i> <sup>b</sup>              |          |            |               |         |           |          |          | -0.75   |          |

Underlined markers represent same genomic region on a chromosome. Values after marker positions represent allelic effects of the markers under different environments

<sup>a, b</sup> signs in superscript indicate markers identified only in MLM analysis (superscript a) and in both MLM and MLMM analyses (superscript b)

Supplementary Table S10 Marker-trait associations for plant height under different environments using MLM and MLMM analyses

| SNP code                  | Clone ID | Chromosome | Position (cM) | BedZT   |        |          | Bed    | Bed   |
|---------------------------|----------|------------|---------------|---------|--------|----------|--------|-------|
|                           |          |            |               | Bed 5IR | 5IR    | Flat 5IR | 2IR    | heat  |
| <u>M3183</u> <sup>b</sup> | 1125541  | 2B         | 117.77        |         |        |          |        | 1.788 |
| <u>M245</u> <sup>a</sup>  | 978657   | 2B         | 118.92        |         |        |          |        | 2.026 |
| <u>M3657</u> <sup>a</sup> | 1021699  | 2B         | 116.12        |         |        |          |        | 1.281 |
| <u>M2120</u> <sup>a</sup> | 1128199  | 2B         | 114.33        |         |        |          |        | 1.427 |
| M6270 <sup>a</sup>        | 2262002  | 3B         | 142.00        | -2.853  |        |          |        |       |
| M6607 <sup>b</sup>        | 2264129  | 3B         | 94.94         | 1.378   |        |          |        |       |
| M5976 <sup>a</sup>        | 1011847  | 5B         | 49.46         |         |        | -1.119   |        |       |
| <i>Rht-2</i> <sup>b</sup> |          |            |               | 3.017   |        |          | 4.087  | 3.424 |
| <i>Rht-1</i> <sup>b</sup> |          |            |               | -2.348  | -2.500 | -2.287   | -3.698 |       |

Underlined markers represent same genomic region on a chromosome. Values after marker positions represent allelic effects of the markers under different environments

<sup>a, b</sup> signs in superscript indicate markers identified only in MLM analysis (superscript a) and in both MLM and MLMM analyses (superscript b)

Supplementary Table S11 Map positions of major genes on consensus map

| Gene          | Chromosome | Position (cM) |
|---------------|------------|---------------|
| <i>Ppd-A1</i> | 2A         | 51.42         |
| <i>Ppd-B1</i> | 2B         | 60.34         |
| <i>Rht-B1</i> | 4B         | 37.75         |
| <i>Vrn-A1</i> | 5A         | 168.64        |
| <i>Vrn-B1</i> | 5B         | 165.80        |
| <i>Vrn-D3</i> | 7D         | 109.43        |

Supplementary Table S12 Marker-trait associations identified for days to heading (DH) exclusively in multi-locus mixed-model analysis. For PH none of the markers was exclusive to MLMM analysis

| Trait | SNP code/gene allele | Clone ID | Chromosome | Position (cM) | <i>P</i> value |           |            |           |           |           |  |
|-------|----------------------|----------|------------|---------------|----------------|-----------|------------|-----------|-----------|-----------|--|
|       |                      |          |            |               | Bed 5IR        | Flat 5IR  | Bed ZT 5IR | Bed drip  | Bed 2IR   | Bed heat  |  |
| DH    | M6121                | 990721   | 2D         | 36.14         |                | 9.478e-05 | 3.107e-07  |           |           |           |  |
|       | <i>Vrn-D3</i>        | -        | 7D         | 109.43        | 1.056e-07      | 3.107e-07 | 4.560e-08  | 2.239e-06 | 2.649e-06 | 2.571e-07 |  |

Supplementary Table S13 Epistatic interactions for grain yield and yield stability coefficient among markers with and without main effects under different treatments

| Treatment | Locus combination | Markers and gene alleles involved in epistasis | Percentage variation explained by interaction (%) |
|-----------|-------------------|------------------------------------------------|---------------------------------------------------|
| Bed 5IR   | 2                 | M1644(AA) M2145(AA)                            | 3.1                                               |
|           | 2                 | M2145(AA) <u>M4418(BB)*</u>                    | 3.2                                               |
|           | 2                 | M1281(BB) <u>M4418(AA)*</u>                    | 3.2                                               |
|           | 3                 | M9211(BB) M1401(AA) M7283(BB)                  | 3.0                                               |
|           | 3                 | M1401(AA) M7283(BB) M8358(AA)                  | 3.0                                               |
|           | 3                 | M330(AA) M1644(AA) M2145(AA)                   | 3.1                                               |
|           | 3                 | M330(AA) M2145(AA) <u>M4418(BB)*</u>           | 3.2                                               |
|           | 3                 | M1644(AA) M2145(AA) <u>M4418(BB)*</u>          | 3.2                                               |
|           | 3                 | M6411(AA) M2145(AA) <u>M4418(BB)*</u>          | 2.9                                               |
|           | 3                 | M2138(BB) M1281(BB) <u>M4418(AA)*</u>          | 3.1                                               |
|           | 3                 | M5437(BB) M1281(BB) <u>M4418(AA)*</u>          | 3.5                                               |
|           | 3                 | M1487(AA) M1281(BB) <u>M4418(AA)*</u>          | 2.9                                               |
|           | Bed ZT 5IR        | 2                                              | M2403(AA) <u>M2716(AA)</u>                        |
| 2         |                   | M3159(BB) <u>M2716(AA)</u>                     | 3.7                                               |
| 2         |                   | M3598(BB) <u>M2716(AA)</u>                     | 3.6                                               |
| 2         |                   | <u>M2716(BB)</u> M1436(AA)                     | 3.6                                               |
| 2         |                   | <u>M2716(AA)</u> M2195(AA)*                    | 3.3                                               |
| 3         |                   | M332(AA) M1436(AA) M3526(BB)                   | 3.6                                               |
| 3         |                   | M6564(BB)* M5011(AA) <u>M2716(BB)</u>          | 3.6                                               |
| 3         |                   | M5011(AA) <u>M2716(BB)</u> M1436(AA)           | 4.0                                               |
| 3         |                   | M5011(AA) M1436(AA) M3526(BB)                  | 3.6                                               |
| 3         |                   | M5011(AA) M3526(BB) M8365(BB)*                 | 3.6                                               |
| 3         |                   | M3598(BB) <u>M2716(AA)</u> M4759(BB)           | 3.5                                               |
| 3         |                   | M3598(BB) <u>M2716(AA)</u> M2195(AA)*          | 3.5                                               |
| 3         |                   | M8728(BB) M3526(BB) M8365(BB)*                 | 4.2                                               |
| Flat 5IR  | 2                 | -                                              | -                                                 |
|           | 3                 | -                                              | -                                                 |
| Bed drip  | 2                 | M7130(BB) <u>M3125(AA)</u>                     | 3.6                                               |
|           | 2                 | M42(AA) <u>M3125(AA)</u>                       | 3.5                                               |
|           | 2                 | M6636(AA) <u>M3125(AA)</u>                     | 3.5                                               |
|           | 2                 | <u>M3125(AA)</u> M4718(BB)*                    | 3.4                                               |
|           | 3                 | M42(AA) M3050(BB) <u>M3125(AA)</u>             | 4.0                                               |
|           | 3                 | M42(AA) M7804(BB) <u>M3125(AA)</u>             | 4.4                                               |
| Bed 2IR   | 3                 | M42(AA) <u>M3125(AA)</u> M4718(BB)*            | 4.9                                               |
|           | 2                 | <u>M4407(AA)</u> <u>M612(AA)*</u>              | 2.5                                               |
|           | 3                 | M4104(BB) <u>M4407(AA)</u> <u>M612(AA)*</u>    | 2.5                                               |
|           | 3                 | M4538(BB) <u>M4407(AA)</u> <u>M612(AA)*</u>    | 2.6                                               |
|           | 3                 | M750(AA) <u>M4407(AA)</u> <u>M612(AA)*</u>     | 2.5                                               |
|           | 3                 | M6895(BB) <u>M4407(AA)</u> <u>M612(AA)*</u>    | 2.6                                               |
|           | 3                 | <u>M4407(AA)</u> M7482(BB) <u>M612(AA)*</u>    | 2.6                                               |
|           | 3                 | <u>M4407(AA)</u> M1021(BB)* <u>M612(AA)*</u>   | 2.4                                               |
|           | 3                 | <u>M4407(AA)</u> <u>M612(AA)*</u>              | 2.4                                               |
|           |                   | M3150(BB)* <sub>s</sub>                        |                                                   |

| Treatment | Locus combination           | Markers and gene alleles involved in epistasis | Percentage variation explained by interaction (%) |     |
|-----------|-----------------------------|------------------------------------------------|---------------------------------------------------|-----|
| Bed heat  | 2                           | M1659(AA) M692(BB)                             | 3.1                                               |     |
|           | 2                           | M1659(AA) <u>M4129(BB)*</u>                    | 3.2                                               |     |
|           | 2                           | M612(AA)* <u>M4129(BB)*</u>                    | 3.2                                               |     |
|           | 2                           | M692(BB) M4782(AA)                             | 3.0                                               |     |
|           | 2                           | M4782(AA) M2337(BB)                            | 3.0                                               |     |
|           | 2                           | M4782(AA) <u>M4129(BB)*</u>                    | 3.1                                               |     |
|           | 2                           | <u>M4129(BB)*</u> M6564(BB)*                   | 3.2                                               |     |
|           | 3                           | M1659(AA) M4787(BB) M4129(BB)*                 | 3.0                                               |     |
|           | 3                           | M1659(AA) M692(BB) M4782(AA)                   | 3.0                                               |     |
|           | 3                           | M1659(AA) M692(BB) M2337(BB)                   | 3.1                                               |     |
|           | 3                           | M1659(AA) M4782(AA) <u>M4129(BB)*</u>          | 2.9                                               |     |
|           | 3                           | M1659(AA) M3989(AA) <u>M4129(BB)*</u>          | 3.0                                               |     |
|           | 3                           | M4787(BB) M612(AA)* <u>M4129(BB)*</u>          | 3.0                                               |     |
|           | 3                           | M10214(BB) M612(AA)* M692(BB)                  | 4.1                                               |     |
|           | 3                           | M612(AA)* M4782(AA) <u>M4129(BB)*</u>          | 3.1                                               |     |
|           | 3                           | M612(AA)* M3989(AA) <u>M4129(BB)*</u>          | 3.0                                               |     |
|           | 3                           | M692(BB) M4782(AA) M2337(BB)                   | 2.9                                               |     |
|           | 3                           | M4782(AA) <u>M4129(BB)*</u><br>M6564(BB)*      | 3.1                                               |     |
|           | Yield stability coefficient | 2                                              | M1436(AA) <u>M3125(BB)</u>                        | 8.1 |
|           |                             | 2                                              | M5456(AA) <u>M3125(AA)</u>                        | 8.2 |
| 2         |                             | M6957(AA) <u>M3125(BB)</u>                     | 8.0                                               |     |
| 2         |                             | M6706(BB) <u>M3125(AA)</u>                     | 8.2                                               |     |
| 2         |                             | M2264(AA) <u>M3125(AA)</u>                     | 8.8                                               |     |
| 2         |                             | <u>M3125(BB)</u> M612(AA)*                     | 8.3                                               |     |
| 3         |                             | M1436(AA) M6957(AA) <u>M3125(BB)</u>           | 9.5                                               |     |
| 3         |                             | M1436(AA) M6957(AA) M2716(BB)                  | 8.9                                               |     |
| 3         |                             | M6957(AA) M2337(BB) <u>M3125(BB)</u>           | 9.4                                               |     |
| 3         |                             | M6957(AA) <u>M3125(BB)</u> M612(AA)*           | 9.2                                               |     |
| 3         |                             | M6957(AA) <u>M3125(BB)</u> M6564(BB)*          | 8.9                                               |     |

The underlined marker indicates the main epistatic locus identified and asterisk sign indicates markers with main effects

Supplementary Table S14 Epistatic interactions for grain yield and yield stability coefficient among markers without main effects

| Treatment  | Locus combination | Marker alleles involved in epistasis | Percentage variation explained by interaction (%) |
|------------|-------------------|--------------------------------------|---------------------------------------------------|
| Bed 5IR    | 2                 | <u>M1401(AA)</u> M3204(BB)           | 3.2                                               |
|            | 2                 | <u>M1401(AA)</u> M3303(BB)           | 3.1                                               |
|            | 2                 | <u>M1401(AA)</u> M1281(BB)           | 3.1                                               |
|            | 2                 | M1644(AA) M2145(AA)                  | 3.3                                               |
|            | 3                 | M9211(BB) <u>M1401(AA)</u> M7283(BB) | 3.0                                               |
|            | 3                 | <u>M1401(AA)</u> M7283(BB) M8358(AA) | 3.0                                               |
|            | 3                 | M330(AA) M1644(AA) M2145(AA)         | 3.1                                               |
| Bed ZT 5IR | 2                 | M2403(AA) <u>M2716(AA)</u>           | 3.5                                               |
|            | 2                 | M3159(BB) <u>M2716(AA)</u>           | 3.7                                               |
|            | 2                 | M3598(BB) <u>M2716(AA)</u>           | 3.3                                               |
|            | 2                 | <u>M2716(BB)</u> M1436(AA)           | 3.6                                               |
|            | 3                 | M332(AA) M1436(AA) M3526(BB)         | 3.6                                               |
|            | 3                 | M5011(AA) <u>M2716(BB)</u> M1436(AA) | 3.4                                               |
|            | 3                 | M5011(AA) M1436(AA) M3526(BB)        | 3.2                                               |
|            | 3                 | M3598(BB) <u>M2716(AA)</u> M4759(BB) | 3.5                                               |
| Flat 5IR   | 2                 | M6636(AA) <u>M2259(BB)</u>           | 4.1                                               |
|            | 2                 | M282(AA) <u>M2259(BB)</u>            | 4.0                                               |
|            | 2                 | <u>M2259(BB)</u> M2773(AA)           | 4.0                                               |
|            | 2                 | <u>M2259(BB)</u> M9968(BB)           | 3.6                                               |
|            | 2                 | <u>M2259(BB)</u> M7617(BB)           | 3.8                                               |
|            | 2                 | <u>M2259(BB)</u> M1757(BB)           | 4.0                                               |



| Treatment | Locus combination | Marker alleles involved in epistasis | Percentage variation explained by interaction (%) |     |
|-----------|-------------------|--------------------------------------|---------------------------------------------------|-----|
| Flat 5IR  | 2                 | <u>M2259(BB)</u> M4169(BB)           | 3.8                                               |     |
|           | 3                 | M6636(AA) M282(AA) <u>M2259(BB)</u>  | 4.1                                               |     |
|           | 3                 | M6636(AA) <u>M2259(BB)</u> M2808(AA) | 4.2                                               |     |
|           | 3                 | M6636(AA) <u>M2259(BB)</u> M1069(AA) | 4.0                                               |     |
|           | 3                 | M282(AA) M2259(BB) M2209(BB)         | 4.0                                               |     |
| Bed drip  | 2                 | M7130(BB) <u>M3125(AA)</u>           | 3.5                                               |     |
|           | 2                 | M42(AA) <u>M3125(AA)</u>             | 3.5                                               |     |
|           | 2                 | M3050(BB) <u>M3125(AA)</u>           | 3.4                                               |     |
|           | 2                 | M7804(BB) <u>M3125(AA)</u>           | 3.4                                               |     |
|           | 2                 | M6636(AA) <u>M3125(AA)</u>           | 3.5                                               |     |
|           | 3                 | M7130(BB) M42(AA) <u>M3125(AA)</u>   | 3.5                                               |     |
|           | 3                 | M7130(BB) M1786(BB) <u>M3125(AA)</u> | 3.5                                               |     |
|           | 3                 | M7130(BB) <u>M3125(AA)</u> M4962(BB) | 3.0                                               |     |
|           | 3                 | M42(AA) M1786(BB) <u>M3125(AA)</u>   | 3.4                                               |     |
|           | 3                 | M42(AA) M3050(BB) <u>M3125(AA)</u>   | 3.4                                               |     |
|           | 3                 | M3050(BB) M6636(AA) <u>M3125(AA)</u> | 3.4                                               |     |
|           | Bed 2IR           | 2                                    | M2493(AA) <u>M4407(BB)</u>                        | 2.5 |
|           |                   | 3                                    | M2493(AA) M6528(BB) <u>M4407(BB)</u>              | 2.4 |
| 3         |                   | M2493(AA) M4607(BB) <u>M4407(BB)</u> | 2.5                                               |     |
| 3         |                   | M2493(AA) M262(BB) <u>M4407(BB)</u>  | 2.4                                               |     |
| 3         |                   | M2493(AA) M1013(BB) <u>M4407(BB)</u> | 2.1                                               |     |

| Treatment                   | Locus combination | Marker alleles involved in epistasis | Percentage variation explained by interaction (%) |
|-----------------------------|-------------------|--------------------------------------|---------------------------------------------------|
| Bed heat                    | 2                 | M1659(AA) <u>M692(BB)</u>            | 3.1                                               |
|                             | 2                 | <u>M692(BB)</u> M4782(AA)            | 3.0                                               |
|                             | 2                 | M4782(AA) M2337(BB)                  | 3.0                                               |
|                             | 3                 | <u>M692(BB)</u> M4782(AA) M2337(BB)  | 3.0                                               |
| Yield stability coefficient | 2                 | M1436(AA) <u>M3125(BB)</u>           | 9.0                                               |
|                             | 2                 | M5456(AA) <u>M3125(AA)</u>           | 9.2                                               |
|                             | 2                 | M6957(AA) <u>M3125(BB)</u>           | 8.9                                               |
|                             | 2                 | M6706(BB) <u>M3125(AA)</u>           | 8.2                                               |
|                             | 2                 | M2264(AA) <u>M3125(AA)</u>           | 8.8                                               |
|                             | 3                 | M1436(AA) M6957(AA) <u>M3125(BB)</u> | 8.7                                               |
|                             | 3                 | M1436(AA) M6957(AA) M2716(BB)        | 8.9                                               |
|                             | 3                 | M6957(AA) M2337(BB) <u>M3125(BB)</u> | 9.4                                               |

The underlined marker indicates the main epistatic locus

Supplementary Table S15 Lines identified with best allelic combination of the four significant markers identified by forward stepwise regression analysis

| GID     | M3125 | M6564 | M3150 | M1021 | P <sub>i</sub> | Mean<br>GY<br>(tons/ha) | DSI  | HSI  |
|---------|-------|-------|-------|-------|----------------|-------------------------|------|------|
| 6177498 | A     | A     | B     | B     | 1.96           | 4.7                     | 1.00 | 0.98 |
| 6177599 | A     | A     | B     | B     | 1.83           | 4.9                     | 0.99 | 0.97 |
| 6177657 | A     | A     | B     | B     | 1.29           | 5.1                     | 0.91 | 0.77 |
| 6177659 | A     | A     | B     | B     | 1.18           | 5.2                     | 0.94 | 0.98 |
| 6177665 | A     | A     | B     | B     | 1.31           | 5.2                     | 0.96 | 1.00 |
| 6178397 | A     | A     | B     | B     | 1.18           | 5.2                     | 0.96 | 0.85 |
| 6178398 | A     | A     | B     | B     | 1.13           | 5.3                     | 0.84 | 0.97 |
| 6178403 | A     | A     | B     | B     | 1.09           | 5.2                     | 0.98 | 1.00 |
| 6178404 | A     | A     | B     | B     | 1.16           | 5.2                     | 0.98 | 1.00 |
| 6178527 | A     | A     | B     | B     | 1.13           | 5.2                     | 0.91 | 0.90 |
| 6178528 | A     | A     | B     | B     | 1.24           | 5.2                     | 0.90 | 0.71 |
| 6178541 | A     | A     | B     | B     | 1.42           | 5.0                     | 0.93 | 0.86 |
| 6178556 | A     | A     | B     | B     | 1.26           | 5.2                     | 0.80 | 1.00 |
| 6179132 | A     | A     | B     | B     | 0.67           | 5.6                     | 0.92 | 1.00 |
| 6179216 | A     | A     | B     | B     | 0.65           | 5.6                     | 1.00 | 0.95 |
| 6179220 | A     | A     | B     | B     | 0.66           | 5.6                     | 1.00 | 0.96 |
| 6179510 | A     | A     | B     | B     | 1.15           | 5.2                     | 0.98 | 0.97 |
| 6179543 | A     | A     | B     | B     | 1.00           | 5.3                     | 0.95 | 0.91 |
| 6181747 | A     | A     | B     | B     | 1.48           | 5.0                     | 1.00 | 0.98 |
| 6181755 | A     | A     | B     | B     | 1.68           | 4.4                     | 0.86 | 0.98 |
| 6181760 | A     | A     | B     | B     | 1.55           | 5.0                     | 0.90 | 1.00 |

P<sub>i</sub> Yield stability coefficient

DSI Drought susceptibility index

HSI Heat susceptibility index

Supplementary Table S16 *In silico* candidate gene analysis of significant markers identified by stepwise regression analysis

| SNP code | Allele | Blast Hit Accession | Consequence             | Gene description                                                    | Interpro-ID (Description/Domain)               |
|----------|--------|---------------------|-------------------------|---------------------------------------------------------------------|------------------------------------------------|
| M1021    | C      | AT4G27590.2         | 3'UTRvariant            | Heavy metal transport/detoxification superfamily protein LENGTH=332 | IPR006121 (Heavy metal-associated domain, HMA) |
| M3150    | T      | AT5G18750.1         | Downstream gene variant | DNAJ heat shock N-terminal domain-containing protein LENGTH=884     | IPR024593 (Domain of unknown function DUF3444) |

Supplementary Table S17 Allele specific SNP and STS markers for major genes controlling phenology and plant height used in the present study

| Gene-specific allele                                   | Marker type * | Function/Effect           | Source/Reference                                     |
|--------------------------------------------------------|---------------|---------------------------|------------------------------------------------------|
| <i>Vrn-A1a</i>                                         | SNP           | Spring growth habit       | CerealsDB; Yan et al. (2004)                         |
| <i>Vrn-A1b</i>                                         | SNP           | Spring growth habit       | CerealsDB; Yan et al. (2004)                         |
| <i>Vrn-A1b</i> (Jagger type)                           | SNP           | Short vernalizing         | CerealsDB; Chen et al. (2009)                        |
| <i>Vrn-A1v/w</i>                                       | CAPS          | Winter growth habit       | -----                                                |
| <i>Vrn-B1a</i>                                         | STS           | Spring growth habit       | MASWHEAT; Fu et al. 2005                             |
| <i>Vrn-B1b</i>                                         | STS           | Spring growth habit       | Santra et al. (2009)                                 |
| <i>Vrn-D1</i>                                          | SNP           | Spring growth habit       | CerealsDB;                                           |
| <i>Vrn-D3</i>                                          | SNP           | Spring growth habit       | Gina Brown, USDA (Pers. commun.); (Chen et al. 2010) |
| <i>Ppd-A1a</i> (GS-100 type)                           | SNP           | Photoperiod insensitivity | CerealsDB; (Wilhelm et al. 2009)                     |
| <i>Ppd-A1a</i> (GS-105 type)                           | SNP           | Photoperiod insensitivity | CerealsDB; (Wilhelm et al. 2009)                     |
| <i>Ppd-A1</i> (Capelle-Desprez deletion) null allele   | SNP           | Photoperiod insensitivity | CerealsDB; (Beales et al. 2007)                      |
| <i>Ppd-A1b</i> (Intron-5 insertion)                    | SNP           | Photoperiod sensitivity   | Gina Brown, USDA (Pers. commun.)                     |
| <i>Ppd-B1a</i> (Chinese Spring retrotransposon exon 7) | SNP           | Photoperiod insensitivity | CerealsDB; (Beales et al. 2007)                      |
| <i>Ppd-B1a</i> (Chinese Spring exon 3)                 | SNP           | Photoperiod insensitivity | Gina Brown, USDA (Pers. commun.)                     |
| <i>Ppd-B1b</i> (Chinese Spring Line Element SNP4)      | SNP           | Photoperiod insensitivity | Gina Brown, USDA (Pers. commun.)                     |
| <i>Ppd-B1b</i> (Chinese Spring SNP5)                   | SNP           | Photoperiod insensitivity | Gina Brown, USDA (Pers. commun.)                     |
| <i>Ppd-B1a</i> (Sonora 64 type deletion)               | SNP           | Photoperiod insensitivity | Gina Brown, USDA (Pers. commun.)                     |
| <i>Ppd-D1a</i> (Ciano67 type deletion)                 | SNP           | Photoperiod insensitivity | CerealsDB; (Beales et al. 2007)                      |
| <i>Ppd-D1b</i> (Mercia type Intron 1 insertion)        | SNP           | Photoperiod sensitivity   | CerealsDB; (Beales et al. 2007)                      |
| <i>Ppd-D1b</i> (Norstar type deletion in exon 7)       | SNP           | Photoperiod sensitivity   | CerealsDB; (Beales et al. 2007)                      |
| <i>Rht-B1</i>                                          | SNP           | Semi-dwarf                | CerealsDB; Ellis et al (2002)                        |
| <i>Rht-D1</i>                                          | SNP           | Semi-dwarf                | CerealsDB; Ellis et al (2002)                        |

\* Genotyping was carried out in the CIMMYT laboratory using allele-specific SNP or sequence tagged site (STS) markers for each gene
